# Supplementary material for: Reliable Dimerization Energies for Modeling of Supramolecular Junctions
Source: MDPI journal article supplement (doi:10.3390/ijms25010602), 2024-01-02
Supplement: s1 [file s1]

Supplementary Information to “Reliable Dimerization Energies for  
Modeling of Supramolecular Junctions” by Czernek & Brus  
(submitted to *IJMS* in 2023)

**Table of Contents**

Table S1 at page S2: Description of the employed geometry of complexes whose size does not exceed 32 atoms

Figure S1 at page S3: The B97-D/def2-TZVPP minima of stacked and H-bonded dimers of “PY-2”

Table S2 at page S4: Computational results for eight dimers that are not a part of the Set50-50

Table S3 at page S4: Results of the linear regression of the predicted interaction energy data for eight dimers that are not a part of the Set50-50

four pages in total

Table S1. Description of the geometry of investigated complexes whose size does not exceed 32 atoms.

| Dimer<br>(Configuration)         | Geometry                                                                              |
|----------------------------------|---------------------------------------------------------------------------------------|
| HCl:water                        | MP2/aTZ from reference [42] of the main text                                          |
| HCN:HF                           | MP2/aTZ from reference [43] of the main text                                          |
| NCH:FH                           | MP2/aTZ from reference [43] of the main text                                          |
| HCN:HCN                          | MP2/aTZ from reference [43] of the main text                                          |
| NH <sub>3</sub> :NH <sub>3</sub> | MP2/aTZ (this work)                                                                   |
| 1-naphtol:water                  | MP2/aTZ from reference [43] of the main text                                          |
| 1-naphtol:NH <sub>3</sub>        | MP2/aTZ from reference [42] of the main text                                          |
| HCl:HCl                          | MP2/aTZ from reference [42] of the main text                                          |
| ethyne:ethyne<br>(T-shaped)      | MP2/aTZ from reference [43] of the main text                                          |
| benzene:water                    | MP2/aTZ from reference [42] of the main text                                          |
| anisole:CO <sub>2</sub>          | MP2/aTZ from reference [43] of the main text                                          |
| anisole:NH <sub>3</sub>          | MP2/aTZ from reference [42] of the main text                                          |
| pyridine:pyridine<br>(CH...N)    | MP2/cc-pVTZ downloaded from <a href="http://www.begdb.org/">http://www.begdb.org/</a> |
| 1-naphtol:ethyne                 | MP2/aTZ from reference [42] of the main text                                          |
| uracil:uracil<br>(stacked)       | MP2/cc-pVTZ downloaded from <a href="http://www.begdb.org/">http://www.begdb.org/</a> |
| aniline:CH <sub>4</sub>          | MP2/aTZ from reference [42] of the main text                                          |
| anisole:CH <sub>4</sub>          | MP2/aTZ from reference [42] of the main text                                          |
| 1-naphtol:CO                     | MP2/aTZ from reference [42] of the main text                                          |
| 1-naphtol:CO <sub>2</sub>        | MP2/aTZ from reference [42] of the main text                                          |
| pyridine:pyridine<br>(T-shaped)  | MP2/cc-pVTZ downloaded from <a href="http://www.begdb.org/">http://www.begdb.org/</a> |
| pyridine:pyridine<br>(stacked)   | MP2/cc-pVTZ downloaded from <a href="http://www.begdb.org/">http://www.begdb.org/</a> |
| 1-naphtol:CH <sub>4</sub>        | MP2/aTZ from reference [42] of the main text                                          |
| anisole:anisole                  | MP2/aTZ from reference [42] of the main text                                          |

Figure S1. The B97-D/def2-TZVPP minima of stacked and H-bonded dimers of “PY-2” shown together with the length scale automatically generated in the Materials Studio 2019.

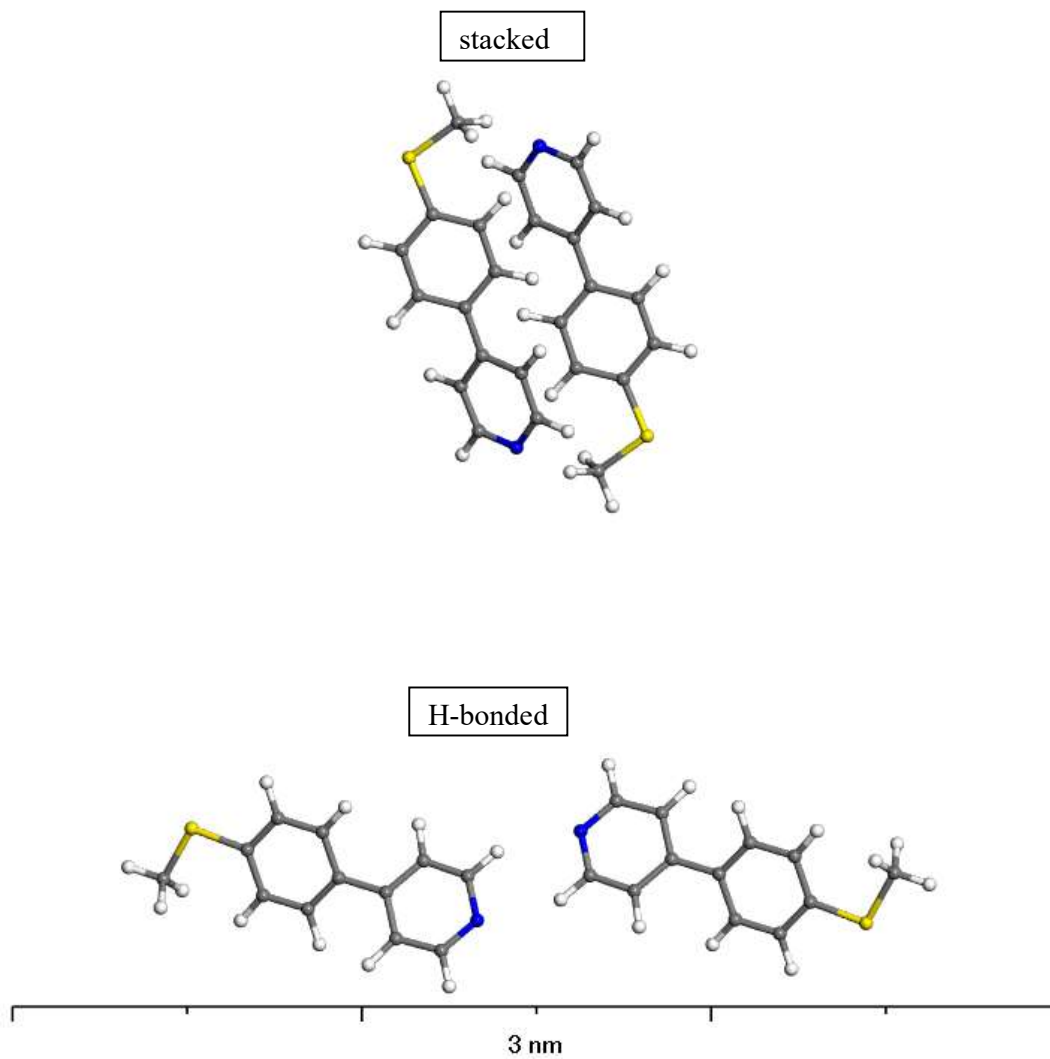

Table S2. Computational results for eight dimers that are not a part of the Set50-50. See the main text for chemical names of “AZ1”, “NA1”, “AZ2” and “AZ3”. The type of intermolecular binding is denoted as “D” to indicate its van der Waals dispersion character.

| Dimer<br>(Configuration) | Type<br>( $E_{\text{disp}}/E_{\text{elst}}$ ) | Negative of the Predicted $\Delta E$ / kJ/mol |                           |                          |                              |                                   |
|--------------------------|-----------------------------------------------|-----------------------------------------------|---------------------------|--------------------------|------------------------------|-----------------------------------|
|                          |                                               | DLPNO-<br>CCSD(T)/CBS                         | $\omega$ B97X-<br>3c/vDZP | B97-<br>D/def2-<br>TZVPP | B3LYP-<br>D3/def2-<br>QZVPPD | B2PLYP-<br>D3(BJ)/def2-<br>QZVPPD |
| AZ1:AZ1 (#1)             | D (2.610)                                     | 67.757                                        | 60.218                    | 65.731                   | 65.814                       | 73.304                            |
| AZ1:AZ1 (#2)             | D (2.337)                                     | 67.466                                        | 61.969                    | 65.312                   | 66.986                       | 71.421                            |
| NA1:NA1 (#1)             | D (3.129)                                     | 62.341                                        | 56.181                    | 61.965                   | 62.760                       | 69.705                            |
| NA1:NA1 (#2)             | D (3.128)                                     | 59.115                                        | 53.837                    | 56.066                   | 56.693                       | 65.689                            |
| AZ2:AZ2 (#1)             | D (2.496)                                     | 84.465                                        | 72.140                    | 76.316                   | 81.463                       | 90.625                            |
| AZ2:AZ2 (#2)             | D (2.500)                                     | 80.520                                        | 69.708                    | 73.889                   | 77.656                       | 86.567                            |
| AZ3:AZ3 (#1)             | D (2.931)                                     | 69.455                                        | 62.940                    | 66.024                   | 68.576                       | 75.479                            |
| AZ3:AZ3 (#2)             | D (2.671)                                     | 66.452                                        | 60.141                    | 63.890                   | 65.814                       | 70.542                            |

Table S3. Results of the linear regression of the predicted interaction energy data for eight dimers that are not a part of the Set50-50 (see Table S1). The model is  $\{y\} = a \times \{x\} + b$ , where  $\{x\}$  is shorthand notation for the canonical CCSD(T)/CBS data, and symbols  $a$ ,  $b$ ,  $\sigma$  and  $|r_{\text{max}}|$  stand for a slope, intercept, standard deviation of residuals and an absolute value of the maximal residual of this model, respectively.

| Method to<br>Obtain $\{y\}$       | Statistical Parameter |              |                   |                             |                |
|-----------------------------------|-----------------------|--------------|-------------------|-----------------------------|----------------|
|                                   | $a$                   | $b$ / kJ/mol | $\sigma$ / kJ/mol | $ r_{\text{max}} $ / kJ/mol | adjusted $R^2$ |
| $\omega$ B97X-<br>3c/vDZP         | 0.7139                | -12.386      | 0.823             | 1.420                       | 0.97954        |
| B97-D/def2-<br>TZVPP              | 0.7326                | -15.089      | 1.134             | 2.231                       | 0.96358        |
| B3LYP-<br>D3/def2-<br>QZVPPD      | 0.9123                | -4.367       | 1.000             | 1.874                       | 0.98144        |
| B2PLYP-<br>D3(BJ)/def2-<br>QZVPPD | 0.9969                | -5.935       | 1.172             | 1.772                       | 0.97870        |
