# Supplementary material for: Reliable Dimerization Energies for Modeling of Supramolecular Junctions
Source: Int J Mol Sci. 2024 Jan 2;25(1):602. doi: 10.3390/ijms25010602 (PMC10778993; doi:10.3390/ijms25010602)
Supplement: Supplementary file 1 [file ijms-25-00602-s001.zip]

Archive with 5 entries (5 files):
- canonical.xlsx
- DFT.xlsx
- DLPNO.xlsx
- DLPNO_miscellaneous.xlsx
- SI.pdf
