# Supplementary material for: Reliable Dimerization Energies for Modeling of Supramolecular Junctions
Source: Int J Mol Sci. 2024 Jan 2;25(1):602. doi: 10.3390/ijms25010602 (PMC10778993; doi:10.3390/ijms25010602)
Supplement: Supplementary file 1 [file ijms-25-00602-s001.zip › canonical.xlsx]

## Sheet: 1
HCl:water complex; its MP2/aTZ geometry is listed below (comes from this authors; 5 atoms)
HCl:water complex; its MP2/aTZ geometry is listed below	value	unit (with comments)
HF_dimer	-536.184	h
HF_monomer1	-76.0669	h
HF_monomer2	-460.112	h
MP2a5Z_dimer	-0.529915	h
MP2a5Z_monomer1	-0.293409	h
MP2a5Z_monomer2	-0.232638	h
CCaTZ_dimer	-0.521403	h
CCaTZ_monomer1	-0.282456	h
CCaTZ_monomer2	-0.236275	h
MP2aTZ_dimer	-0.480553	h
MP2aTZ_monomer1	-0.269123	h
MP2aTZ_monomer2	-0.208089	h
correction_dimer	-0.0408499	in h: CCaTZ_dimer - MP2aTZ_dimer
correction_monomer1	-0.0133332	in h: CCaTZ_monomer1 - MP2aTZ_monomer1
correction_monomer2	-0.0281863	in h: CCaTZ_monomer2 - MP2aTZ_monomer2
E_dimer	-536.755	in h: HF_dimer + MP2a5Z_dimer + correction_dimer
E_monomer1	-76.3736	in h: HF_monomer1 + MP2a5Z_monomer1 + correction_monomer1
E_monomer2	-460.373	in h: HF_monomer2 + MP2a5Z_monomer2 + correction_monomer2
HF_part	-14.1349	kJ/mol: 2625.5*(HF_dimer-HF_monomer1-HF_monomer2)
MP2_part	-10.1554	kJ/mol: 2625.5*(MP2a5Z_dimer-MP2a5Z_monomer1-MP2a5Z_monomer2)
correction_part	1.75822	kJ/mol: 2625.5*(correction_dimer-correction_monomer1-correction_monomer2)
dE	-22.5321	kJ/mol: 2625.5*(E_dimer - E_monomer1 - E_monomer2)
		Turbomole input of coordinates (in Bohr):
		4.38407618911167 0.00047847865685 -0.17835348625743 cl 1.94392574604816 0.00215844518898 -0.29697726479706 h -1.58030577739399 0.00079973209944 -0.35850296823155 o -2.37729588421237 1.43980350557826 0.41805352991194 h -2.37040027355347 -1.44324016152352 0.41578018937408 h

## Sheet: 2
HCN:HF complex; its MP2/aTZ geometry is listed below (comes from this authors; 5 atoms)
quantity (named in a self-explanatory way)	value	unit (with comments)
HF_dimer	-192.993	h
HF_monomer1	-100.069	h
HF_monomer2	-92.9139	h
MP2a5Z_dimer	-0.693649	h
MP2a5Z_monomer1	-0.311049	h
MP2a5Z_monomer2	-0.379835	h
CCaTZ_dimer	-0.665948	h
CCaTZ_monomer1	-0.289788	h
CCaTZ_monomer2	-0.374099	h
MP2aTZ_dimer	-0.636233	h
MP2aTZ_monomer1	-0.2811	h
MP2aTZ_monomer2	-0.352708	h
correction_dimer	-0.0297148	in h: CCaTZ_dimer - MP2aTZ_dimer
correction_monomer1	-0.00868723	in h: CCaTZ_monomer1 - MP2aTZ_monomer1
correction_monomer2	-0.0213907	in h: CCaTZ_monomer2 - MP2aTZ_monomer2
E_dimer	-193.716	in h: HF_dimer + MP2a5Z_dimer + correction_dimer
E_monomer1	-100.389	in h: HF_monomer1 + MP2a5Z_monomer1 + correction_monomer1
E_monomer2	-93.3152	in h: HF_monomer2 + MP2a5Z_monomer2 + correction_monomer2
HF_part	-24.8654	kJ/mol: 2625.5*(HF_dimer-HF_monomer1-HF_monomer2)
MP2_part	-7.25809	kJ/mol: 2625.5*(MP2a5Z_dimer-MP2a5Z_monomer1-MP2a5Z_monomer2)
correction_part	0.953585	kJ/mol: 2625.5*(correction_dimer-correction_monomer1-correction_monomer2)
dE	-31.1699	kJ/mol: 2625.5*(E_dimer - E_monomer1 - E_monomer2)
		Turbomole input of coordinates (in Bohr):
		0.00000000000000 0.00000000000000 -0.46012072335612 n 0.00000000000000 0.00000000000000 -2.65843913374198 c 0.00000000000000 0.00000000000000 -4.67212941121879 h 0.00000000000000 0.00000000000000 3.01221136157246 h 0.00000000000000 0.00000000000000 4.77847790674442 f

## Sheet: 3
NCH:FH complex; its MP2/aTZ geometry is listed below (comes from this authors; 5 atoms)
quantity (named in a self-explanatory way)	value	unit (with comments)
HF_dimer	-192.988	h
HF_monomer1	-100.07	h
HF_monomer2	-92.9132	h
MP2a5Z_dimer	-0.691247	h
MP2a5Z_monomer1	-0.310408	h
MP2a5Z_monomer2	-0.380484	h
CCaTZ_dimer	-0.664088	h
CCaTZ_monomer1	-0.289118	h
CCaTZ_monomer2	-0.374633	h
MP2aTZ_dimer	-0.633941	h
MP2aTZ_monomer1	-0.280407	h
MP2aTZ_monomer2	-0.353319	h
correction_dimer	-0.0301468	in h: CCaTZ_dimer - MP2aTZ_dimer
correction_monomer1	-0.00871155	in h: CCaTZ_monomer1 - MP2aTZ_monomer1
correction_monomer2	-0.0213147	in h: CCaTZ_monomer2 - MP2aTZ_monomer2
E_dimer	-193.709	in h: HF_dimer + MP2a5Z_dimer + correction_dimer
E_monomer1	-100.389	in h: HF_monomer1 + MP2a5Z_monomer1 + correction_monomer1
E_monomer2	-93.315	in h: HF_monomer2 + MP2a5Z_monomer2 + correction_monomer2
HF_part	-11.0059	kJ/mol: 2625.5*(HF_dimer-HF_monomer1-HF_monomer2)
MP2_part	-0.93363	kJ/mol: 2625.5*(MP2a5Z_dimer-MP2a5Z_monomer1-MP2a5Z_monomer2)
correction_part	-0.316537	kJ/mol: 2625.5*(correction_dimer-correction_monomer1-correction_monomer2)
dE	-12.2561	kJ/mol: 2625.5*(E_dimer - E_monomer1 - E_monomer2)
		Turbomole input of coordinates (in Bohr):
		-2.63636675456466 0.01436191860993 0.00000000000000 c -0.63313044205497 0.24504834655582 0.00000000000000 h -4.82606990351070 -0.24805301110710 0.00000000000000 n 3.36789032307103 0.54120055692325 0.00000000000000 f 4.72767677705928 -0.55255781098189 0.00000000000000 h

## Sheet: 4
HCN:HCN complex; its MP2/aTZ geometry is listed below (comes from this authors; 6 atoms)
quantity (named in a self-explanatory way)	value	unit (with comments)
HF_dimer	-185.833	h
HF_monomer1	-92.913	h
HF_monomer2	-92.9135	h
MP2a5Z_dimer	-0.762146	h
MP2a5Z_monomer1	-0.38062	h
MP2a5Z_monomer2	-0.38019	h
CCaTZ_dimer	-0.750173	h
CCaTZ_monomer1	-0.374873	h
CCaTZ_monomer2	-0.374423	h
MP2aTZ_dimer	-0.707791	h
MP2aTZ_monomer1	-0.353554	h
MP2aTZ_monomer2	-0.353075	h
correction_dimer	-0.0423818	in h: CCaTZ_dimer - MP2aTZ_dimer
correction_monomer1	-0.0213183	in h: CCaTZ_monomer1 - MP2aTZ_monomer1
correction_monomer2	-0.0213486	in h: CCaTZ_monomer2 - MP2aTZ_monomer2
E_dimer	-186.637	in h: HF_dimer + MP2a5Z_dimer + correction_dimer
E_monomer1	-93.315	in h: HF_monomer1 + MP2a5Z_monomer1 + correction_monomer1
E_monomer2	-93.3151	in h: HF_monomer2 + MP2a5Z_monomer2 + correction_monomer2
HF_part	-16.7402	kJ/mol: 2625.5*(HF_dimer-HF_monomer1-HF_monomer2)
MP2_part	-3.50889	kJ/mol: 2625.5*(MP2a5Z_dimer-MP2a5Z_monomer1-MP2a5Z_monomer2)
correction_part	0.748463	kJ/mol: 2625.5*(correction_dimer-correction_monomer1-correction_monomer2)
dE	-19.5007	kJ/mol: 2625.5*(E_dimer - E_monomer1 - E_monomer2)
		Turbomole input of coordinates (in Bohr):
		0.00000000000000 0.00000000000000 -2.04076784828057 n 0.00000000000000 0.00000000000000 -4.24291106435940 c 0.00000000000000 0.00000000000000 -6.25739691653816 h 0.00000000000000 0.00000000000000 2.09568958878933 h 0.00000000000000 0.00000000000000 4.11963729971545 c 0.00000000000000 0.00000000000000 6.32574894067334 n

## Sheet: 5
NH3:NH3 complex (C_s symmetry); its MP2/aTZ geometry is listed below (comes from this authors; 8 atoms)
quantity (named in a self-explanatory way)	value	unit (with comments)
HF_dimer	-112.452	h
HF_monomer1	-56.2248	h
HF_monomer2	-56.2247	h
MP2a5Z_dimer	-0.520699	h
MP2a5Z_monomer1	-0.259051	h
MP2a5Z_monomer2	-0.259061	h
CCaTZ_dimer	-0.523317	h
CCaTZ_monomer1	-0.26046	h
CCaTZ_monomer2	-0.260473	h
MP2aTZ_dimer	-0.483337	h
MP2aTZ_monomer1	-0.240469	h
MP2aTZ_monomer2	-0.240472	h
correction_dimer	-0.0399793	in h: CCaTZ_dimer - MP2aTZ_dimer
correction_monomer1	-0.0199912	in h: CCaTZ_monomer1 - MP2aTZ_monomer1
correction_monomer2	-0.0200013	in h: CCaTZ_monomer2 - MP2aTZ_monomer2
E_dimer	-113.013	in h: HF_dimer + MP2a5Z_dimer + correction_dimer
E_monomer1	-56.5038	in h: HF_monomer1 + MP2a5Z_monomer1 + correction_monomer1
E_monomer2	-56.5038	in h: HF_monomer2 + MP2a5Z_monomer2 + correction_monomer2
HF_part	-6.40112	kJ/mol: 2625.5*(HF_dimer-HF_monomer1-HF_monomer2)
MP2_part	-6.78939	kJ/mol: 2625.5*(MP2a5Z_dimer-MP2a5Z_monomer1-MP2a5Z_monomer2)
correction_part	0.0345753	kJ/mol: 2625.5*(correction_dimer-correction_monomer1-correction_monomer2)
dE	-13.1559	kJ/mol: 2625.5*(E_dimer - E_monomer1 - E_monomer2)
		Turbomole input of coordinates (in Bohr):
		0.19256073078338 3.23484311533584 0.00000000000000 n -0.50528867392543 4.14264298313437 -1.53230900129005 h -0.50528867392543 4.14264298313437 1.53230900129005 h -0.55160019226406 1.46481223570717 0.00000000000000 h -0.00407850142630 -2.83347945765693 0.00000000000000 n 1.81649310362639 -2.24002608343326 0.00000000000000 h -0.22139889643428 -3.95571788811080 -1.53449163497353 h -0.22139889643428 …

## Sheet: 6
pyridine:pyridine complex (C-H…N H-bonds) ; its MP2/cc-pVTZ geometry is listed below (comes from www.begdb.org; 22 atoms)
quantity (named in a self-explanatory way)	value	unit (with comments)
HF_dimer	-493.593	h
HF_monomer1	-246.796	h
HF_monomer2	-246.796	h
MP2a5Z_dimer	-2.15342	h
MP2a5Z_monomer1	-1.0742	h
MP2a5Z_monomer2	-1.0742	h
CCaTZ_dimer	-2.14604	h
CCaTZ_monomer1	-1.07076	h
CCaTZ_monomer2	-1.07076	h
MP2aTZ_dimer	-2.00369	h
MP2aTZ_monomer1	-0.999464	h
MP2aTZ_monomer2	-0.999464	h
correction_dimer	-0.142353	in h: CCaTZ_dimer - MP2aTZ_dimer
correction_monomer1	-0.071299	in h: CCaTZ_monomer1 - MP2aTZ_monomer1
correction_monomer2	-0.071299	in h: CCaTZ_monomer2 - MP2aTZ_monomer2
E_dimer	-495.889	in h: HF_dimer + MP2a5Z_dimer + correction_dimer
E_monomer1	-247.941	in h: HF_monomer1 + MP2a5Z_monomer1 + correction_monomer1
E_monomer2	-247.941	in h: HF_monomer2 + MP2a5Z_monomer2 + correction_monomer2
HF_part	-4.92323	kJ/mol: 2625.5*(HF_dimer-HF_monomer1-HF_monomer2)
MP2_part	-13.1619	kJ/mol: 2625.5*(MP2a5Z_dimer-MP2a5Z_monomer1-MP2a5Z_monomer2)
correction_part	0.643467	kJ/mol: 2625.5*(correction_dimer-correction_monomer1-correction_monomer2)
dE	-17.4417	kJ/mol: 2625.5*(E_dimer - E_monomer1 - E_monomer2)
		Turbomole input of coordinates (in Bohr):
		-3.28563116201748 1.64476031487899 -0.00526298425739 n -3.25075437650894 -0.89204489556629 0.03944764502886 c -1.39883079194790 -1.76738466923914 0.06963820830457 h -5.43105203534844 -2.36724067559625 0.04683949777025 c -5.27989261332206 -4.40354832548766 0.08385327818644 h -7.77392290520969 -1.17732060576220 0.00584886807591 c -9.50351733056056 -2.26532049059110 0.00999629159373 h -7.83549461024…

## Sheet: 7
1-naphtol:water complex; its MP2/aTZ geometry is listed below (comes from this authors; 22 atoms)
quantity (named in a self-explanatory way)	value	unit (with comments)
HF_dimer	-534.474	h
HF_monomer1	-76.0669	h
HF_monomer2	-458.4	h
MP2a5Z_dimer	-2.27132	h
MP2a5Z_monomer1	-0.293465	h
MP2a5Z_monomer2	-1.97422	h
CCaTZ_dimer	-2.24066	h
CCaTZ_monomer1	-0.282685	h
CCaTZ_monomer2	-1.95473	h
MP2aTZ_dimer	-2.10812	h
MP2aTZ_monomer1	-0.269354	h
MP2aTZ_monomer2	-1.8355	h
correction_dimer	-0.132541	in h: CCaTZ_dimer - MP2aTZ_dimer
correction_monomer1	-0.0133315	in h: CCaTZ_monomer1 - MP2aTZ_monomer1
correction_monomer2	-0.119224	in h: CCaTZ_monomer2 - MP2aTZ_monomer2
E_dimer	-536.878	in h: HF_dimer + MP2a5Z_dimer + correction_dimer
E_monomer1	-76.3737	in h: HF_monomer1 + MP2a5Z_monomer1 + correction_monomer1
E_monomer2	-460.493	in h: HF_monomer2 + MP2a5Z_monomer2 + correction_monomer2
HF_part	-20.3577	kJ/mol: 2625.5*(HF_dimer-HF_monomer1-HF_monomer2)
MP2_part	-9.54403	kJ/mol: 2625.5*(MP2a5Z_dimer-MP2a5Z_monomer1-MP2a5Z_monomer2)
correction_part	0.0376251	kJ/mol: 2625.5*(correction_dimer-correction_monomer1-correction_monomer2)
dE	-29.8641	kJ/mol: 2625.5*(E_dimer - E_monomer1 - E_monomer2)
		Turbomole input of coordinates (in Bohr):
		-3.91063550777664 3.65283786617539 0.00000000000000 c -5.95832762756246 3.72124406245972 0.00000000000000 h -2.70819143106471 1.26454906710279 0.00000000000000 c -4.10074006701880 -1.01803412127458 0.00000000000000 c -6.14645175381736 -0.94162871426975 0.00000000000000 h -2.85460930156682 -3.30192500013591 0.00000000000000 c -3.91823409655697 -5.04991033469833 0.00000000000000 h -0.19284122626915…

## Sheet: 8
1-naphtol:NH3 complex; its MP2/aTZ geometry is listed below (comes from this authors; 23 atoms)
quantity (named in a self-explanatory way)	value	unit (with comments)
HF_dimer	-514.634	h
HF_monomer1	-56.2248	h
HF_monomer2	-458.399	h
MP2a5Z_dimer	-2.23954	h
MP2a5Z_monomer1	-0.259158	h
MP2a5Z_monomer2	-1.97466	h
CCaTZ_dimer	-2.22099	h
CCaTZ_monomer1	-0.260811	h
CCaTZ_monomer2	-1.9552	h
MP2aTZ_dimer	-2.0821	h
MP2aTZ_monomer1	-0.240856	h
MP2aTZ_monomer2	-1.83602	h
correction_dimer	-0.13889	in h: CCaTZ_dimer - MP2aTZ_dimer
correction_monomer1	-0.0199549	in h: CCaTZ_monomer1 - MP2aTZ_monomer1
correction_monomer2	-0.11918	in h: CCaTZ_monomer2 - MP2aTZ_monomer2
E_dimer	-517.012	in h: HF_dimer + MP2a5Z_dimer + correction_dimer
E_monomer1	-56.5039	in h: HF_monomer1 + MP2a5Z_monomer1 + correction_monomer1
E_monomer2	-460.493	in h: HF_monomer2 + MP2a5Z_monomer2 + correction_monomer2
HF_part	-26.1352	kJ/mol: 2625.5*(HF_dimer-HF_monomer1-HF_monomer2)
MP2_part	-15.0253	kJ/mol: 2625.5*(MP2a5Z_dimer-MP2a5Z_monomer1-MP2a5Z_monomer2)
correction_part	0.640706	kJ/mol: 2625.5*(correction_dimer-correction_monomer1-correction_monomer2)
dE	-40.5199	kJ/mol: 2625.5*(E_dimer - E_monomer1 - E_monomer2)
		Turbomole input of coordinates (in Bohr):
		4.08447156412626 4.02935901605274 0.00000000000000 c 6.13016246393735 4.14387641970561 0.00000000000000 h 2.93635522400865 1.61435326891341 0.00000000000000 c 4.38189744990726 -0.63512758679421 0.00000000000000 c 6.42539815713034 -0.51312875738124 0.00000000000000 h 3.18593135437886 -2.94540282192289 0.00000000000000 c 4.28832010153290 -4.66954737159282 0.00000000000000 h 0.52721707651193 -3.1087…

## Sheet: 9
HCl:HCl complex; its MP2/aTZ geometry is listed below (comes from this authors; 4 atoms)
quantity (named in a self-explanatory way)	value	unit (with comments)
HF_dimer	-920.225	h
HF_monomer1	-460.112	h
HF_monomer2	-460.112	h
MP2a5Z_dimer	-0.468251	h
MP2a5Z_monomer1	-0.232456	h
MP2a5Z_monomer2	-0.232409	h
CCaTZ_dimer	-0.47459	h
CCaTZ_monomer1	-0.236055	h
CCaTZ_monomer2	-0.235909	h
MP2aTZ_dimer	-0.418838	h
MP2aTZ_monomer1	-0.207952	h
MP2aTZ_monomer2	-0.207785	h
correction_dimer	-0.055752	in h: CCaTZ_dimer - MP2aTZ_dimer
correction_monomer1	-0.0281033	in h: CCaTZ_monomer1 - MP2aTZ_monomer1
correction_monomer2	-0.0281231	in h: CCaTZ_monomer2 - MP2aTZ_monomer2
E_dimer	-920.749	in h: HF_dimer + MP2a5Z_dimer + correction_dimer
E_monomer1	-460.373	in h: HF_monomer1 + MP2a5Z_monomer1 + correction_monomer1
E_monomer2	-460.373	in h: HF_monomer2 + MP2a5Z_monomer2 + correction_monomer2
HF_part	-0.294844	kJ/mol: 2625.5*(HF_dimer-HF_monomer1-HF_monomer2)
MP2_part	-8.8904	kJ/mol: 2625.5*(MP2a5Z_dimer-MP2a5Z_monomer1-MP2a5Z_monomer2)
correction_part	1.24556	kJ/mol: 2625.5*(correction_dimer-correction_monomer1-correction_monomer2)
dE	-7.93969	kJ/mol: 2625.5*(E_dimer - E_monomer1 - E_monomer2)
		Turbomole input of coordinates (in Bohr):
		-1.87581066207460 -2.88821537509596 0.00000000000000 h 0.53569909171889 -2.95244338690048 0.00000000000000 cl 0.80441247863683 1.71830387862472 0.00000000000000 h 0.53569909171889 4.12235488337172 0.00000000000000 cl

## Sheet: 10
acetylene:acetylene complex (T-shaped); its MP2/aTZ geometry is listed below (comes from this authors; 8 atoms)
quantity (named in a self-explanatory way)	value	unit (with comments)
HF_dimer	-153.709	h
HF_monomer1	-76.8543	h
HF_monomer2	-76.8543	h
MP2a5Z_dimer	-0.679986	h
MP2a5Z_monomer1	-0.33891	h
MP2a5Z_monomer2	-0.338942	h
CCaTZ_dimer	-0.688642	h
CCaTZ_monomer1	-0.343435	h
CCaTZ_monomer2	-0.343437	h
MP2aTZ_dimer	-0.632676	h
MP2aTZ_monomer1	-0.315356	h
MP2aTZ_monomer2	-0.315318	h
correction_dimer	-0.0559663	in h: CCaTZ_dimer - MP2aTZ_dimer
correction_monomer1	-0.0280796	in h: CCaTZ_monomer1 - MP2aTZ_monomer1
correction_monomer2	-0.0281191	in h: CCaTZ_monomer2 - MP2aTZ_monomer2
E_dimer	-154.445	in h: HF_dimer + MP2a5Z_dimer + correction_dimer
E_monomer1	-77.2213	in h: HF_monomer1 + MP2a5Z_monomer1 + correction_monomer1
E_monomer2	-77.2213	in h: HF_monomer2 + MP2a5Z_monomer2 + correction_monomer2
HF_part	-1.26719	kJ/mol: 2625.5*(HF_dimer-HF_monomer1-HF_monomer2)
MP2_part	-5.6046	kJ/mol: 2625.5*(MP2a5Z_dimer-MP2a5Z_monomer1-MP2a5Z_monomer2)
correction_part	0.61015	kJ/mol: 2625.5*(correction_dimer-correction_monomer1-correction_monomer2)
dE	-6.26165	kJ/mol: 2625.5*(E_dimer - E_monomer1 - E_monomer2)
		Turbomole input of coordinates (in Bohr):
		0.00000000000000 0.00000000000000 7.19302638740275 h 0.00000000000000 0.00000000000000 5.18607865276808 c 0.00000000000000 0.00000000000000 2.89375203644955 c 0.00000000000000 0.00000000000000 0.88240690910365 h -3.15366000823554 0.00000000000000 -4.04076241434788 h -1.14582032286615 0.00000000000000 -4.03686957851414 c 1.14582032286615 0.00000000000000 -4.03686957851414 c 3.15366000823554 0.0000…

[truncated: 40 more sheets: 11, 12, 13, 14, 15, 16, 17, 18, 19, 20, 21, 22, 23, 24, 25, 26, 27, 28, 29, 30 …]
