# Supplementary material for: Reliable Dimerization Energies for Modeling of Supramolecular Junctions
Source: Int J Mol Sci. 2024 Jan 2;25(1):602. doi: 10.3390/ijms25010602 (PMC10778993; doi:10.3390/ijms25010602)
Supplement: Supplementary file 1 [file ijms-25-00602-s001.zip › DFT.xlsx]

## Sheet: 1
HCl:water complex // MP2/aTZ
quantity (named in a self-explanatory way)	value	unit (with comments)
B2PLYP_dimer	-537.143	h; B2PLYP is a shorthand notation for the B2PLYP-D3/def2-QZVPPD approach
B2PLYP_monomers	-537.134	h; the counterpoise-corrected value
dE_B2PLYP	-23.6133	kJ/mol: 2625.5*(B2PLYP_dimer - B2PLYP_monomers)
B3LYP_dimer	-537.335	h; B3LYP is a shorthand notation for the B3LYP-D3/def2-QZVPPD approach
B3LYP_monomers	-537.326	h; the counterpoise-corrected value
dE_B3PLYP	-24.4052	kJ/mol: 2625.5*(B3LYP_dimer - B3LYP_monomers)
omega_dimer	-32.9164	h; omega is a shorthand notation for the wB97X-3c/vDZP approach
omega_monomer1	-15.6364	h; no counterpoise correction
omega_monomer2	-17.2711	h; no counterpoise correction
dE_omega	-23.661	kJ/mol: 2625.5*(omega_dimer - omega_monomer1 - omega_monomer2)
E(elst)	-15.7378	mh; the CBS-extrapolated first-order electrostatic SAPT term
E(exch)	18.9487	mh; the CBS-extrapolated first-order exchange SAPT term
E(ind)	-8.79726	mh; the CBS-extrapolated second-order induction SAPT term
E(exch-ind)	5.43565	mh; the CBS-extrapolated second-order exchange–induction SAPT term
E(disp)	-6.88699	mh; the CBS-extrapolated second-order dispersion SAPT term
E(exch-disp)	1.44866	mh; the CBS-extrapolated second-order exchange–dispersion SAPT term
d(HF)	-3.37393	mh; the CBS-extrapolated estimate of higher-order SAPT terms
E(SAPT)	-8.96301	mh; E(SAPT) = E(elst) + E(exch) + E(ind) + E(ind-exch) + E(disp) + E(disp-exch) + d(HF)
dE_SAPT	-23.5324	kJ/mol: 2.6255*E(SAPT)

## Sheet: 2
HCN:HF complex // MP2/aTZ
quantity (named in a self-explanatory way)	value	unit (with comments)
B2PLYP_dimer	-193.869	h; B2PLYP is a shorthand notation for the B2PLYP-D3/def2-QZVPPD approach
B2PLYP_monomers	-193.857	h; the counterpoise-corrected value
dE_B2PLYP	-32.455	kJ/mol: 2625.5*(B2PLYP_dimer - B2PLYP_monomers)
B3LYP_dimer	-193.982	h; B3LYP is a shorthand notation for the B3LYP-D3/def2-QZVPPD approach
B3LYP_monomers	-193.97	h; the counterpoise-corrected value
dE_B3PLYP	-32.7886	kJ/mol: 2625.5*(B3LYP_dimer - B3LYP_monomers)
omega_dimer	-41.1614	h; omega is a shorthand notation for the wB97X-3c/vDZP approach
omega_monomer1	-16.2116	h; no counterpoise correction
omega_monomer2	-24.9377	h; no counterpoise correction
dE_omega	-31.8982	kJ/mol: 2625.5*(omega_dimer - omega_monomer1 - omega_monomer2)
E(elst)	-16.2116	mh; the CBS-extrapolated first-order electrostatic SAPT term
E(exch)	16.3208	mh; the CBS-extrapolated first-order exchange SAPT term
E(ind)	-8.95757	mh; the CBS-extrapolated second-order induction SAPT term
E(exch-ind)	4.37268	mh; the CBS-extrapolated second-order exchange–induction SAPT term
E(disp)	-5.54875	mh; the CBS-extrapolated second-order dispersion SAPT term
E(exch-disp)	1.04787	mh; the CBS-extrapolated second-order exchange–dispersion SAPT term
d(HF)	-2.47851	mh; the CBS-extrapolated estimate of higher-order SAPT terms
E(SAPT)	-11.4552	mh; E(SAPT) = E(elst) + E(exch) + E(ind) + E(ind-exch) + E(disp) + E(disp-exch) + d(HF)
dE_SAPT	-30.0755	kJ/mol: 2.6255*E(SAPT)

## Sheet: 3
NCH:FH complex // MP2/aTZ
quantity (named in a self-explanatory way)	value	unit (with comments)
B2PLYP_dimer	-193.861	h; B2PLYP is a shorthand notation for the B2PLYP-D3/def2-QZVPPD approach
B2PLYP_monomers	-193.857	h; the counterpoise-corrected value
dE_B2PLYP	-12.3382	kJ/mol: 2625.5*(B2PLYP_dimer - B2PLYP_monomers)
B3LYP_dimer	-193.975	h; B3LYP is a shorthand notation for the B3LYP-D3/def2-QZVPPD approach
B3LYP_monomers	-193.97	h; the counterpoise-corrected value
dE_B3PLYP	-13.2026	kJ/mol: 2625.5*(B3LYP_dimer - B3LYP_monomers)
omega_dimer	-41.1539	h; omega is a shorthand notation for the wB97X-3c/vDZP approach
omega_monomer1	-16.2113	h; no counterpoise correction
omega_monomer2	-24.9379	h; no counterpoise correction
dE_omega	-12.6113	kJ/mol: 2625.5*(omega_dimer - omega_monomer1 - omega_monomer2)
E(elst)	-5.87032	mh; the CBS-extrapolated first-order electrostatic SAPT term
E(exch)	4.39071	mh; the CBS-extrapolated first-order exchange SAPT term
E(ind)	-1.77038	mh; the CBS-extrapolated second-order induction SAPT term
E(exch-ind)	0.955219	mh; the CBS-extrapolated second-order exchange–induction SAPT term
E(disp)	-2.3005	mh; the CBS-extrapolated second-order dispersion SAPT term
E(exch-disp)	0.321802	mh; the CBS-extrapolated second-order exchange–dispersion SAPT term
d(HF)	-0.466909	mh; the CBS-extrapolated estimate of higher-order SAPT terms
E(SAPT)	-4.74038	mh; E(SAPT) = E(elst) + E(exch) + E(ind) + E(ind-exch) + E(disp) + E(disp-exch) + d(HF)
dE_SAPT	-12.4459	kJ/mol: 2.6255*E(SAPT)

## Sheet: 4
HCN:HCN complex // MP2/aTZ
quantity (named in a self-explanatory way)	value	unit (with comments)
B2PLYP_dimer	-186.817	h; B2PLYP is a shorthand notation for the B2PLYP-D3/def2-QZVPPD approach
B2PLYP_monomers	-186.809	h; the counterpoise-corrected value
dE_B2PLYP	-20.1224	kJ/mol: 2625.5*(B2PLYP_dimer - B2PLYP_monomers)
B3LYP_dimer	-186.947	h; B3LYP is a shorthand notation for the B3LYP-D3/def2-QZVPPD approach
B3LYP_monomers	-186.939	h; the counterpoise-corrected value
dE_B3PLYP	-19.8926	kJ/mol: 2625.5*(B3LYP_dimer - B3LYP_monomers)
omega_dimer	-32.4307	h; omega is a shorthand notation for the wB97X-3c/vDZP approach
omega_monomer1	-16.2114	h; no counterpoise correction
omega_monomer2	-16.2113	h; no counterpoise correction
dE_omega	-21.0739	kJ/mol: 2625.5*(omega_dimer - omega_monomer1 - omega_monomer2)
E(elst)	-9.58381	mh; the CBS-extrapolated first-order electrostatic SAPT term
E(exch)	7.72831	mh; the CBS-extrapolated first-order exchange SAPT term
E(ind)	-2.88997	mh; the CBS-extrapolated second-order induction SAPT term
E(exch-ind)	1.30364	mh; the CBS-extrapolated second-order exchange–induction SAPT term
E(disp)	-3.34597	mh; the CBS-extrapolated second-order dispersion SAPT term
E(exch-disp)	0.497545	mh; the CBS-extrapolated second-order exchange–dispersion SAPT term
d(HF)	-1.00851	mh; the CBS-extrapolated estimate of higher-order SAPT terms
E(SAPT)	-7.29876	mh; E(SAPT) = E(elst) + E(exch) + E(ind) + E(ind-exch) + E(disp) + E(disp-exch) + d(HF)
dE_SAPT	-19.1629	kJ/mol: 2.6255*E(SAPT)

## Sheet: 5
NH3:NH3 complex (C_s symmetry) // MP2/aTZ
quantity (named in a self-explanatory way)	value	unit (with comments)
B2PLYP_dimer	-113.098	h; B2PLYP is a shorthand notation for the B2PLYP-D3/def2-QZVPPD approach
B2PLYP_monomers	-113.093	h; the counterpoise-corrected value
dE_B2PLYP	-12.8992	kJ/mol: 2625.5*(B2PLYP_dimer - B2PLYP_monomers)
B3LYP_dimer	-113.193	h; B3LYP is a shorthand notation for the B3LYP-D3/def2-QZVPPD approach
B3LYP_monomers	-113.188	h; the counterpoise-corrected value
dE_B3PLYP	-13.605	kJ/mol: 2625.5*(B3LYP_dimer - B3LYP_monomers)
omega_dimer	-23.5628	h; omega is a shorthand notation for the wB97X-3c/vDZP approach
omega_monomer1	-11.7788	h; no counterpoise correction
omega_monomer2	-11.7788	h; no counterpoise correction
dE_omega	-13.8305	kJ/mol: 2625.5*(omega_dimer - omega_monomer1 - omega_monomer2)
E(elst)	-8.25513	mh; the CBS-extrapolated first-order electrostatic SAPT term
E(exch)	8.46674	mh; the CBS-extrapolated first-order exchange SAPT term
E(ind)	-3.09916	mh; the CBS-extrapolated second-order induction SAPT term
E(exch-ind)	1.98411	mh; the CBS-extrapolated second-order exchange–induction SAPT term
E(disp)	-4.34983	mh; the CBS-extrapolated second-order dispersion SAPT term
E(exch-disp)	0.859115	mh; the CBS-extrapolated second-order exchange–dispersion SAPT term
d(HF)	-0.788899	mh; the CBS-extrapolated estimate of higher-order SAPT terms
E(SAPT)	-5.18305	mh; E(SAPT) = E(elst) + E(exch) + E(ind) + E(ind-exch) + E(disp) + E(disp-exch) + d(HF)
dE_SAPT	-13.6081	kJ/mol: 2.6255*E(SAPT)

## Sheet: 6
pyridine:pyridine complex (C-H…N H-bonds) // MP2/cc-pVTZ from www.begdb.org
quantity (named in a self-explanatory way)	value	unit (with comments)
B2PLYP_dimer	-496.409	h; B2PLYP is a shorthand notation for the B2PLYP-D3/def2-QZVPPD approach
B2PLYP_monomers	-496.402	h; the counterpoise-corrected value
dE_B2PLYP	-16.5653	kJ/mol: 2625.5*(B2PLYP_dimer - B2PLYP_monomers)
B3LYP_dimer	-496.807	h; B3LYP is a shorthand notation for the B3LYP-D3/def2-QZVPPD approach
B3LYP_monomers	-496.801	h; the counterpoise-corrected value
dE_B3PLYP	-16.7276	kJ/mol: 2625.5*(B3LYP_dimer - B3LYP_monomers)
omega_dimer	-82.8641	h; omega is a shorthand notation for the wB97X-3c/vDZP approach
omega_monomer1	-41.4286	h; no counterpoise correction
omega_monomer2	-41.4286	h; no counterpoise correction
dE_omega	-18.0674	kJ/mol: 2625.5*(omega_dimer - omega_monomer1 - omega_monomer2)
E(elst)	-7.74175	mh; the CBS-extrapolated first-order electrostatic SAPT term
E(exch)	10.0714	mh; the CBS-extrapolated first-order exchange SAPT term
E(ind)	-3.40592	mh; the CBS-extrapolated second-order induction SAPT term
E(exch-ind)	2.05792	mh; the CBS-extrapolated second-order exchange–induction SAPT term
E(disp)	-7.63744	mh; the CBS-extrapolated second-order dispersion SAPT term
E(exch-disp)	1.23555	mh; the CBS-extrapolated second-order exchange–dispersion SAPT term
d(HF)	-0.831824	mh; the CBS-extrapolated estimate of higher-order SAPT terms
E(SAPT)	-6.25207	mh; E(SAPT) = E(elst) + E(exch) + E(ind) + E(ind-exch) + E(disp) + E(disp-exch) + d(HF)
dE_SAPT	-16.4148	kJ/mol: 2.6255*E(SAPT)

## Sheet: 7
1-naphtol:water complex // MP2/aTZ
quantity (named in a self-explanatory way)	value	unit (with comments)
B2PLYP_dimer	-537.412	h; B2PLYP is a shorthand notation for the B2PLYP-D3/def2-QZVPPD approach
B2PLYP_monomers	-537.401	h; the counterpoise-corrected value
dE_B2PLYP	-29.4943	kJ/mol: 2625.5*(B2PLYP_dimer - B2PLYP_monomers)
B3LYP_dimer	-537.818	h; B3LYP is a shorthand notation for the B3LYP-D3/def2-QZVPPD approach
B3LYP_monomers	-537.807	h; the counterpoise-corrected value
dE_B3PLYP	-30.5717	kJ/mol: 2625.5*(B3LYP_dimer - B3LYP_monomers)
omega_dimer	-95.1075	h; omega is a shorthand notation for the wB97X-3c/vDZP approach
omega_monomer1	-77.8245	h; no counterpoise correction
omega_monomer2	-17.2711	h; no counterpoise correction
dE_omega	-31.2493	kJ/mol: 2625.5*(omega_dimer - omega_monomer1 - omega_monomer2)
E(elst)	-17.6147	mh; the CBS-extrapolated first-order electrostatic SAPT term
E(exch)	19.0541	mh; the CBS-extrapolated first-order exchange SAPT term
E(ind)	-9.47761	mh; the CBS-extrapolated second-order induction SAPT term
E(exch-ind)	5.89935	mh; the CBS-extrapolated second-order exchange–induction SAPT term
E(disp)	-7.93333	mh; the CBS-extrapolated second-order dispersion SAPT term
E(exch-disp)	1.60058	mh; the CBS-extrapolated second-order exchange–dispersion SAPT term
d(HF)	-2.42531	mh; the CBS-extrapolated estimate of higher-order SAPT terms
E(SAPT)	-10.897	mh; E(SAPT) = E(elst) + E(exch) + E(ind) + E(ind-exch) + E(disp) + E(disp-exch) + d(HF)
dE_SAPT	-28.61	kJ/mol: 2.6255*E(SAPT)

## Sheet: 8
1-naphtol:NH3 complex // MP2/aTZ
quantity (named in a self-explanatory way)	value	unit (with comments)
B2PLYP_dimer	-517.537	h; B2PLYP is a shorthand notation for the B2PLYP-D3/def2-QZVPPD approach
B2PLYP_monomers	-517.521	h; the counterpoise-corrected value
dE_B2PLYP	-40.8103	kJ/mol: 2625.5*(B2PLYP_dimer - B2PLYP_monomers)
B3LYP_dimer	-517.943	h; B3LYP is a shorthand notation for the B3LYP-D3/def2-QZVPPD approach
B3LYP_monomers	-517.927	h; the counterpoise-corrected value
dE_B3PLYP	-42.3305	kJ/mol: 2625.5*(B3LYP_dimer - B3LYP_monomers)
omega_dimer	-89.6192	h; omega is a shorthand notation for the wB97X-3c/vDZP approach
omega_monomer1	-77.8239	h; no counterpoise correction
omega_monomer2	-11.7788	h; no counterpoise correction
dE_omega	-43.4299	kJ/mol: 2625.5*(omega_dimer - omega_monomer1 - omega_monomer2)
E(elst)	-26.6767	mh; the CBS-extrapolated first-order electrostatic SAPT term
E(exch)	30.7115	mh; the CBS-extrapolated first-order exchange SAPT term
E(ind)	-17.1219	mh; the CBS-extrapolated second-order induction SAPT term
E(exch-ind)	10.9398	mh; the CBS-extrapolated second-order exchange–induction SAPT term
E(disp)	-11.3156	mh; the CBS-extrapolated second-order dispersion SAPT term
E(exch-disp)	2.6391	mh; the CBS-extrapolated second-order exchange–dispersion SAPT term
d(HF)	-4.7403	mh; the CBS-extrapolated estimate of higher-order SAPT terms
E(SAPT)	-15.5641	mh; E(SAPT) = E(elst) + E(exch) + E(ind) + E(ind-exch) + E(disp) + E(disp-exch) + d(HF)
dE_SAPT	-40.8635	kJ/mol: 2.6255*E(SAPT)

## Sheet: 9
HCl:HCl complex // MP2/aTZ
quantity (named in a self-explanatory way)	value	unit (with comments)
B2PLYP_dimer	-921.419	h; B2PLYP is a shorthand notation for the B2PLYP-D3/def2-QZVPPD approach
B2PLYP_monomers	-921.416	h; the counterpoise-corrected value
dE_B2PLYP	-8.47976	kJ/mol: 2625.5*(B2PLYP_dimer - B2PLYP_monomers)
B3LYP_dimer	-921.708	h; B3LYP is a shorthand notation for the B3LYP-D3/def2-QZVPPD approach
B3LYP_monomers	-921.704	h; the counterpoise-corrected value
dE_B3PLYP	-8.82377	kJ/mol: 2625.5*(B3LYP_dimer - B3LYP_monomers)
omega_dimer	-31.2755	h; omega is a shorthand notation for the wB97X-3c/vDZP approach
omega_monomer1	-15.6364	h; no counterpoise correction
omega_monomer2	-15.6364	h; no counterpoise correction
dE_omega	-7.15426	kJ/mol: 2625.5*(omega_dimer - omega_monomer1 - omega_monomer2)
E(elst)	-4.32186	mh; the CBS-extrapolated first-order electrostatic SAPT term
E(exch)	6.7217	mh; the CBS-extrapolated first-order exchange SAPT term
E(ind)	-3.5404	mh; the CBS-extrapolated second-order induction SAPT term
E(exch-ind)	2.33403	mh; the CBS-extrapolated second-order exchange–induction SAPT term
E(disp)	-4.14641	mh; the CBS-extrapolated second-order dispersion SAPT term
E(exch-disp)	0.646649	mh; the CBS-extrapolated second-order exchange–dispersion SAPT term
d(HF)	-1.19003	mh; the CBS-extrapolated estimate of higher-order SAPT terms
E(SAPT)	-3.49632	mh; E(SAPT) = E(elst) + E(exch) + E(ind) + E(ind-exch) + E(disp) + E(disp-exch) + d(HF)
dE_SAPT	-9.1796	kJ/mol: 2.6255*E(SAPT)

## Sheet: 10
acetylene:acetylene complex (T-shaped) // MP2/aTZ
quantity (named in a self-explanatory way)	value	unit (with comments)
B2PLYP_dimer	-154.61	h; B2PLYP is a shorthand notation for the B2PLYP-D3/def2-QZVPPD approach
B2PLYP_monomers	-154.607	h; the counterpoise-corrected value
dE_B2PLYP	-6.35022	kJ/mol: 2625.5*(B2PLYP_dimer - B2PLYP_monomers)
B3LYP_dimer	-154.745	h; B3LYP is a shorthand notation for the B3LYP-D3/def2-QZVPPD approach
B3LYP_monomers	-154.742	h; the counterpoise-corrected value
dE_B3PLYP	-6.91986	kJ/mol: 2625.5*(B3LYP_dimer - B3LYP_monomers)
omega_dimer	-25.0042	h; omega is a shorthand notation for the wB97X-3c/vDZP approach
omega_monomer1	-12.5008	h; no counterpoise correction
omega_monomer2	-12.5008	h; no counterpoise correction
dE_omega	-6.65087	kJ/mol: 2625.5*(omega_dimer - omega_monomer1 - omega_monomer2)
E(elst)	-3.43784	mh; the CBS-extrapolated first-order electrostatic SAPT term
E(exch)	4.41311	mh; the CBS-extrapolated first-order exchange SAPT term
E(ind)	-1.35993	mh; the CBS-extrapolated second-order induction SAPT term
E(exch-ind)	0.882784	mh; the CBS-extrapolated second-order exchange–induction SAPT term
E(disp)	-3.06261	mh; the CBS-extrapolated second-order dispersion SAPT term
E(exch-disp)	0.44271	mh; the CBS-extrapolated second-order exchange–dispersion SAPT term
d(HF)	-0.64184	mh; the CBS-extrapolated estimate of higher-order SAPT terms
E(SAPT)	-2.76362	mh; E(SAPT) = E(elst) + E(exch) + E(ind) + E(ind-exch) + E(disp) + E(disp-exch) + d(HF)
dE_SAPT	-7.25589	kJ/mol: 2.6255*E(SAPT)

[truncated: 40 more sheets: 11, 12, 13, 14, 15, 16, 17, 18, 19, 20, 21, 22, 23, 24, 25, 26, 27, 28, 29, 30 …]
