# Supplementary material for: Reliable Dimerization Energies for Modeling of Supramolecular Junctions
Source: Int J Mol Sci. 2024 Jan 2;25(1):602. doi: 10.3390/ijms25010602 (PMC10778993; doi:10.3390/ijms25010602)
Supplement: Supplementary file 1 [file ijms-25-00602-s001.zip › DLPNO.xlsx]

## Sheet: 1
HCl:water complex // MP2/aTZ
quantity (named in a self-explanatory way)	value	unit (with comments)
HF_dimer	-536.182	h (using the aQZ basis set)
HF_monomer1	-76.0656	h (using the aQZ basis set)
HF_monomer2	-460.111	h (using the aQZ basis set)
MP2aQZ_dimer	-0.515286	h (from the DLPNO approximation)
MP2aQZ_monomer1	-0.286503	h (from the DLPNO approximation)
MP2aQZ_monomer2	-0.225067	h (from the DLPNO approximation)
CCaQZ_dimer	-0.55496	h (from the DLPNO approximation)
CCaQZ_monomer1	-0.298323	h (from the DLPNO approximation)
CCaQZ_monomer2	-0.25357	h (from the DLPNO approximation)
CCaTZ_dimer	-0.521884	h (from the DLPNO approximation)
CCaTZ_monomer1	-0.282616	h (from the DLPNO approximation)
CCaTZ_monomer2	-0.236665	h (from the DLPNO approximation)
MP2aTZ_dimer	-0.480506	h (from the DLPNO approximation)
MP2aTZ_monomer1	-0.269099	h (from the DLPNO approximation)
MP2aTZ_monomer2	-0.208068	h (from the DLPNO approximation)
MP2_dimer	-0.540666	in h: (MP2aTZ_dimer*3^3 - MP2aQZ_dimer*4^3)/(3^3-4^3)
MP2_monomer1	-0.299204	in h: (MP2aTZ_monomer1*3^3 - MP2aQZ_monomer1*4^3)/(3^3-4^3)
MP2_monomer2	-0.237471	in h: (MP2aTZ_monomer2*3^3 - MP2aQZ_monomer2*4^3)/(3^3-4^3)
MP2correction_dimer	-0.540666	in h: (MP2aTZ_dimer*3^3 - MP2aQZ_dimer*4^3)/(3^3-4^3)
MP2correction_monomer1	-0.299204	in h: (MP2aTZ_monomer1*3^3 - MP2aQZ_monomer1*4^3)/(3^3-4^3)
MP2correction_monomer2	-0.237471	in h: (MP2aTZ_monomer2*3^3 - MP2aQZ_monomer2*4^3)/(3^3-4^3)
CCcorrection_dimer	-0.579097	in h: (CCaTZ_dimer*3^3 - CCaQZ_dimer*4^3)/(3^3-4^3)
CCcorrection_monomer1	-0.309785	in h: (CCaTZ_monomer1*3^3 - CCaQZ_monomer1*4^3)/(3^3-4^3)
CCcorrection_monomer2	-0.265906	in h: (CCaTZ_monomer2*3^3 - CCaQZ_monomer2*4^3)/(3^3-4^3)
correction_dimer	-0.038431	in h: CCcorrection_dimer - MP2correction_dimer
correction_monomer1	-0.0105809	in h: CCcorrection_monomer1 - MP2correction_monomer1
correction_monomer2	-0.0284347	in h: CCcorrection_monomer2 - MP2correction_monomer2
E_dimer	-536.761	in h: HF_dimer + MP2_dimer + correction_dimer
E_monomer1	-76.3754	in h: HF_monomer1 + MP2_monomer1 + correction_monomer1
E_monomer2	-460.377	in h: HF_monomer2 + MP2_monomer2 + correction_monomer2
HF_part	-14.2588	kJ/mol: 2625.5*(HF_dimer-HF_monomer1-HF_monomer2)
MP2_part	-10.4757	kJ/mol: 2625.5*(MP2_dimer-MP2_monomer1-MP2_monomer2)
correction_part	1.53498	kJ/mol: 2625.5*(correction_dimer-correction_monomer1-correction_monomer2)
dE	-23.1995	kJ/mol: 2625.5*(E_dimer - E_monomer1 - E_monomer2)

## Sheet: 2
HCN:HF complex // MP2/aTZ
quantity (named in a self-explanatory way)	value	unit (with comments)
HF_dimer	-192.99	h (using the aQZ basis set)
HF_monomer1	-100.067	h (using the aQZ basis set)
HF_monomer2	-92.9128	h (using the aQZ basis set)
MP2aQZ_dimer	-0.677263	h (from the DLPNO approximation)
MP2aQZ_monomer1	-0.302352	h (from the DLPNO approximation)
MP2aQZ_monomer2	-0.37224	h (from the DLPNO approximation)
CCaQZ_dimer	-0.703304	h (from the DLPNO approximation)
CCaQZ_monomer1	-0.310105	h (from the DLPNO approximation)
CCaQZ_monomer2	-0.390955	h (from the DLPNO approximation)
CCaTZ_dimer	-0.666217	h (from the DLPNO approximation)
CCaTZ_monomer1	-0.289942	h (from the DLPNO approximation)
CCaTZ_monomer2	-0.374316	h (from the DLPNO approximation)
MP2aTZ_dimer	-0.6362	h (from the DLPNO approximation)
MP2aTZ_monomer1	-0.28108	h (from the DLPNO approximation)
MP2aTZ_monomer2	-0.352703	h (from the DLPNO approximation)
MP2_dimer	-0.707227	in h: (MP2aTZ_dimer*3^3 - MP2aQZ_dimer*4^3)/(3^3-4^3)
MP2_monomer1	-0.317875	in h: (MP2aTZ_monomer1*3^3 - MP2aQZ_monomer1*4^3)/(3^3-4^3)
MP2_monomer2	-0.386497	in h: (MP2aTZ_monomer2*3^3 - MP2aQZ_monomer2*4^3)/(3^3-4^3)
MP2correction_dimer	-0.707227	in h: (MP2aTZ_dimer*3^3 - MP2aQZ_dimer*4^3)/(3^3-4^3)
MP2correction_monomer1	-0.317875	in h: (MP2aTZ_monomer1*3^3 - MP2aQZ_monomer1*4^3)/(3^3-4^3)
MP2correction_monomer2	-0.386497	in h: (MP2aTZ_monomer2*3^3 - MP2aQZ_monomer2*4^3)/(3^3-4^3)
CCcorrection_dimer	-0.730368	in h: (CCaTZ_dimer*3^3 - CCaQZ_dimer*4^3)/(3^3-4^3)
CCcorrection_monomer1	-0.324818	in h: (CCaTZ_monomer1*3^3 - CCaQZ_monomer1*4^3)/(3^3-4^3)
CCcorrection_monomer2	-0.403097	in h: (CCaTZ_monomer2*3^3 - CCaQZ_monomer2*4^3)/(3^3-4^3)
correction_dimer	-0.0231409	in h: CCcorrection_dimer - MP2correction_dimer
correction_monomer1	-0.0069436	in h: CCcorrection_monomer1 - MP2correction_monomer1
correction_monomer2	-0.0166003	in h: CCcorrection_monomer2 - MP2correction_monomer2
E_dimer	-193.72	in h: HF_dimer + MP2_dimer + correction_dimer
E_monomer1	-100.392	in h: HF_monomer1 + MP2_monomer1 + correction_monomer1
E_monomer2	-93.3159	in h: HF_monomer2 + MP2_monomer2 + correction_monomer2
HF_part	-24.8681	kJ/mol: 2625.5*(HF_dimer-HF_monomer1-HF_monomer2)
MP2_part	-7.49738	kJ/mol: 2625.5*(MP2_dimer-MP2_monomer1-MP2_monomer2)
correction_part	1.05795	kJ/mol: 2625.5*(correction_dimer-correction_monomer1-correction_monomer2)
dE	-31.3075	kJ/mol: 2625.5*(E_dimer - E_monomer1 - E_monomer2)

## Sheet: 3
NCH:FH complex // MP2/aTZ
quantity (named in a self-explanatory way)	value	unit (with comments)
HF_dimer	-192.984	h (using the aQZ basis set)
HF_monomer1	-100.068	h (using the aQZ basis set)
HF_monomer2	-92.912	h (using the aQZ basis set)
MP2aQZ_dimer	-0.674731	h (from the DLPNO approximation)
MP2aQZ_monomer1	-0.301649	h (from the DLPNO approximation)
MP2aQZ_monomer2	-0.372771	h (from the DLPNO approximation)
CCaQZ_dimer	-0.701261	h (from the DLPNO approximation)
CCaQZ_monomer1	-0.309435	h (from the DLPNO approximation)
CCaQZ_monomer2	-0.391431	h (from the DLPNO approximation)
CCaTZ_dimer	-0.664383	h (from the DLPNO approximation)
CCaTZ_monomer1	-0.289296	h (from the DLPNO approximation)
CCaTZ_monomer2	-0.374843	h (from the DLPNO approximation)
MP2aTZ_dimer	-0.63391	h (from the DLPNO approximation)
MP2aTZ_monomer1	-0.280372	h (from the DLPNO approximation)
MP2aTZ_monomer2	-0.353312	h (from the DLPNO approximation)
MP2_dimer	-0.70452	in h: (MP2aTZ_dimer*3^3 - MP2aQZ_dimer*4^3)/(3^3-4^3)
MP2_monomer1	-0.317175	in h: (MP2aTZ_monomer1*3^3 - MP2aQZ_monomer1*4^3)/(3^3-4^3)
MP2_monomer2	-0.38697	in h: (MP2aTZ_monomer2*3^3 - MP2aQZ_monomer2*4^3)/(3^3-4^3)
MP2correction_dimer	-0.70452	in h: (MP2aTZ_dimer*3^3 - MP2aQZ_dimer*4^3)/(3^3-4^3)
MP2correction_monomer1	-0.317175	in h: (MP2aTZ_monomer1*3^3 - MP2aQZ_monomer1*4^3)/(3^3-4^3)
MP2correction_monomer2	-0.38697	in h: (MP2aTZ_monomer2*3^3 - MP2aQZ_monomer2*4^3)/(3^3-4^3)
CCcorrection_dimer	-0.728171	in h: (CCaTZ_dimer*3^3 - CCaQZ_dimer*4^3)/(3^3-4^3)
CCcorrection_monomer1	-0.324131	in h: (CCaTZ_monomer1*3^3 - CCaQZ_monomer1*4^3)/(3^3-4^3)
CCcorrection_monomer2	-0.403536	in h: (CCaTZ_monomer2*3^3 - CCaQZ_monomer2*4^3)/(3^3-4^3)
correction_dimer	-0.0236515	in h: CCcorrection_dimer - MP2correction_dimer
correction_monomer1	-0.00695547	in h: CCcorrection_monomer1 - MP2correction_monomer1
correction_monomer2	-0.0165655	in h: CCcorrection_monomer2 - MP2correction_monomer2
E_dimer	-193.713	in h: HF_dimer + MP2_dimer + correction_dimer
E_monomer1	-100.392	in h: HF_monomer1 + MP2_monomer1 + correction_monomer1
E_monomer2	-93.3156	in h: HF_monomer2 + MP2_monomer2 + correction_monomer2
HF_part	-10.9835	kJ/mol: 2625.5*(HF_dimer-HF_monomer1-HF_monomer2)
MP2_part	-0.982406	kJ/mol: 2625.5*(MP2_dimer-MP2_monomer1-MP2_monomer2)
correction_part	-0.342626	kJ/mol: 2625.5*(correction_dimer-correction_monomer1-correction_monomer2)
dE	-12.3085	kJ/mol: 2625.5*(E_dimer - E_monomer1 - E_monomer2)

## Sheet: 4
HCN:HCN complex // MP2/aTZ
quantity (named in a self-explanatory way)	value	unit (with comments)
HF_dimer	-185.831	h (using the aQZ basis set)
HF_monomer1	-92.9119	h (using the aQZ basis set)
HF_monomer2	-92.9124	h (using the aQZ basis set)
MP2aQZ_dimer	-0.746773	h (from the DLPNO approximation)
MP2aQZ_monomer1	-0.372946	h (from the DLPNO approximation)
MP2aQZ_monomer2	-0.372563	h (from the DLPNO approximation)
CCaQZ_dimer	-0.783806	h (from the DLPNO approximation)
CCaQZ_monomer1	-0.391599	h (from the DLPNO approximation)
CCaQZ_monomer2	-0.391237	h (from the DLPNO approximation)
CCaTZ_dimer	-0.750538	h (from the DLPNO approximation)
CCaTZ_monomer1	-0.375078	h (from the DLPNO approximation)
CCaTZ_monomer2	-0.374641	h (from the DLPNO approximation)
MP2aTZ_dimer	-0.707771	h (from the DLPNO approximation)
MP2aTZ_monomer1	-0.353545	h (from the DLPNO approximation)
MP2aTZ_monomer2	-0.35307	h (from the DLPNO approximation)
MP2_dimer	-0.775233	in h: (MP2aTZ_dimer*3^3 - MP2aQZ_dimer*4^3)/(3^3-4^3)
MP2_monomer1	-0.387103	in h: (MP2aTZ_monomer1*3^3 - MP2aQZ_monomer1*4^3)/(3^3-4^3)
MP2_monomer2	-0.386788	in h: (MP2aTZ_monomer2*3^3 - MP2aQZ_monomer2*4^3)/(3^3-4^3)
MP2correction_dimer	-0.775233	in h: (MP2aTZ_dimer*3^3 - MP2aQZ_dimer*4^3)/(3^3-4^3)
MP2correction_monomer1	-0.387103	in h: (MP2aTZ_monomer1*3^3 - MP2aQZ_monomer1*4^3)/(3^3-4^3)
MP2correction_monomer2	-0.386788	in h: (MP2aTZ_monomer2*3^3 - MP2aQZ_monomer2*4^3)/(3^3-4^3)
CCcorrection_dimer	-0.808082	in h: (CCaTZ_dimer*3^3 - CCaQZ_dimer*4^3)/(3^3-4^3)
CCcorrection_monomer1	-0.403654	in h: (CCaTZ_monomer1*3^3 - CCaQZ_monomer1*4^3)/(3^3-4^3)
CCcorrection_monomer2	-0.403347	in h: (CCaTZ_monomer2*3^3 - CCaQZ_monomer2*4^3)/(3^3-4^3)
correction_dimer	-0.0328489	in h: CCcorrection_dimer - MP2correction_dimer
correction_monomer1	-0.0165515	in h: CCcorrection_monomer1 - MP2correction_monomer1
correction_monomer2	-0.0165591	in h: CCcorrection_monomer2 - MP2correction_monomer2
E_dimer	-186.639	in h: HF_dimer + MP2_dimer + correction_dimer
E_monomer1	-93.3156	in h: HF_monomer1 + MP2_monomer1 + correction_monomer1
E_monomer2	-93.3158	in h: HF_monomer2 + MP2_monomer2 + correction_monomer2
HF_part	-16.74	kJ/mol: 2625.5*(HF_dimer-HF_monomer1-HF_monomer2)
MP2_part	-3.52468	kJ/mol: 2625.5*(MP2_dimer-MP2_monomer1-MP2_monomer2)
correction_part	0.686992	kJ/mol: 2625.5*(correction_dimer-correction_monomer1-correction_monomer2)
dE	-19.5777	kJ/mol: 2625.5*(E_dimer - E_monomer1 - E_monomer2)

## Sheet: 5
NH3:NH3 complex (C_s symmetry) // MP2/aTZ
quantity (named in a self-explanatory way)	value	unit (with comments)
HF_dimer	-112.45	h (using the aQZ basis set)
HF_monomer1	-56.2239	h (using the aQZ basis set)
HF_monomer2	-56.2239	h (using the aQZ basis set)
MP2aQZ_dimer	-0.510359	h (from the DLPNO approximation)
MP2aQZ_monomer1	-0.253918	h (from the DLPNO approximation)
MP2aQZ_monomer2	-0.253908	h (from the DLPNO approximation)
CCaQZ_dimer	-0.546594	h (from the DLPNO approximation)
CCaQZ_monomer1	-0.272054	h (from the DLPNO approximation)
CCaQZ_monomer2	-0.272058	h (from the DLPNO approximation)
CCaTZ_dimer	-0.523547	h (from the DLPNO approximation)
CCaTZ_monomer1	-0.260594	h (from the DLPNO approximation)
CCaTZ_monomer2	-0.260612	h (from the DLPNO approximation)
MP2aTZ_dimer	-0.483202	h (from the DLPNO approximation)
MP2aTZ_monomer1	-0.240408	h (from the DLPNO approximation)
MP2aTZ_monomer2	-0.2404	h (from the DLPNO approximation)
MP2_dimer	-0.530176	in h: (MP2aTZ_dimer*3^3 - MP2aQZ_dimer*4^3)/(3^3-4^3)
MP2_monomer1	-0.263777	in h: (MP2aTZ_monomer1*3^3 - MP2aQZ_monomer1*4^3)/(3^3-4^3)
MP2_monomer2	-0.263764	in h: (MP2aTZ_monomer2*3^3 - MP2aQZ_monomer2*4^3)/(3^3-4^3)
MP2correction_dimer	-0.530176	in h: (MP2aTZ_dimer*3^3 - MP2aQZ_dimer*4^3)/(3^3-4^3)
MP2correction_monomer1	-0.263777	in h: (MP2aTZ_monomer1*3^3 - MP2aQZ_monomer1*4^3)/(3^3-4^3)
MP2correction_monomer2	-0.263764	in h: (MP2aTZ_monomer2*3^3 - MP2aQZ_monomer2*4^3)/(3^3-4^3)
CCcorrection_dimer	-0.563412	in h: (CCaTZ_dimer*3^3 - CCaQZ_dimer*4^3)/(3^3-4^3)
CCcorrection_monomer1	-0.280417	in h: (CCaTZ_monomer1*3^3 - CCaQZ_monomer1*4^3)/(3^3-4^3)
CCcorrection_monomer2	-0.28041	in h: (CCaTZ_monomer2*3^3 - CCaQZ_monomer2*4^3)/(3^3-4^3)
correction_dimer	-0.0332355	in h: CCcorrection_dimer - MP2correction_dimer
correction_monomer1	-0.0166403	in h: CCcorrection_monomer1 - MP2correction_monomer1
correction_monomer2	-0.0166457	in h: CCcorrection_monomer2 - MP2correction_monomer2
E_dimer	-113.014	in h: HF_dimer + MP2_dimer + correction_dimer
E_monomer1	-56.5044	in h: HF_monomer1 + MP2_monomer1 + correction_monomer1
E_monomer2	-56.5043	in h: HF_monomer2 + MP2_monomer2 + correction_monomer2
HF_part	-6.39805	kJ/mol: 2625.5*(HF_dimer-HF_monomer1-HF_monomer2)
MP2_part	-6.91862	kJ/mol: 2625.5*(MP2_dimer-MP2_monomer1-MP2_monomer2)
correction_part	0.132362	kJ/mol: 2625.5*(correction_dimer-correction_monomer1-correction_monomer2)
dE	-13.1843	kJ/mol: 2625.5*(E_dimer - E_monomer1 - E_monomer2)

## Sheet: 6
pyridine:pyridine complex (C-H…N H-bonds) // MP2/cc-pVTZ from www.begdb.org
quantity (named in a self-explanatory way)	value	unit (with comments)
HF_dimer	-493.587	h (using the aQZ basis set)
HF_monomer1	-246.793	h (using the aQZ basis set)
HF_monomer2	-246.793	h (using the aQZ basis set)
MP2aQZ_dimer	-2.11194	h (from the DLPNO approximation)
MP2aQZ_monomer1	-1.05345	h (from the DLPNO approximation)
MP2aQZ_monomer2	-1.05346	h (from the DLPNO approximation)
CCaQZ_dimer	-2.23865	h (from the DLPNO approximation)
CCaQZ_monomer1	-1.11698	h (from the DLPNO approximation)
CCaQZ_monomer2	-1.11699	h (from the DLPNO approximation)
CCaTZ_dimer	-2.14553	h (from the DLPNO approximation)
CCaTZ_monomer1	-1.0705	h (from the DLPNO approximation)
CCaTZ_monomer2	-1.0705	h (from the DLPNO approximation)
MP2aTZ_dimer	-2.00307	h (from the DLPNO approximation)
MP2aTZ_monomer1	-0.999118	h (from the DLPNO approximation)
MP2aTZ_monomer2	-0.999118	h (from the DLPNO approximation)
MP2_dimer	-2.19138	in h: (MP2aTZ_dimer*3^3 - MP2aQZ_dimer*4^3)/(3^3-4^3)
MP2_monomer1	-1.0931	in h: (MP2aTZ_monomer1*3^3 - MP2aQZ_monomer1*4^3)/(3^3-4^3)
MP2_monomer2	-1.09311	in h: (MP2aTZ_monomer2*3^3 - MP2aQZ_monomer2*4^3)/(3^3-4^3)
MP2correction_dimer	-2.19138	in h: (MP2aTZ_dimer*3^3 - MP2aQZ_dimer*4^3)/(3^3-4^3)
MP2correction_monomer1	-1.0931	in h: (MP2aTZ_monomer1*3^3 - MP2aQZ_monomer1*4^3)/(3^3-4^3)
MP2correction_monomer2	-1.09311	in h: (MP2aTZ_monomer2*3^3 - MP2aQZ_monomer2*4^3)/(3^3-4^3)
CCcorrection_dimer	-2.30661	in h: (CCaTZ_dimer*3^3 - CCaQZ_dimer*4^3)/(3^3-4^3)
CCcorrection_monomer1	-1.15091	in h: (CCaTZ_monomer1*3^3 - CCaQZ_monomer1*4^3)/(3^3-4^3)
CCcorrection_monomer2	-1.15091	in h: (CCaTZ_monomer2*3^3 - CCaQZ_monomer2*4^3)/(3^3-4^3)
correction_dimer	-0.115227	in h: CCcorrection_dimer - MP2correction_dimer
correction_monomer1	-0.0578127	in h: CCcorrection_monomer1 - MP2correction_monomer1
correction_monomer2	-0.0578073	in h: CCcorrection_monomer2 - MP2correction_monomer2
E_dimer	-495.894	in h: HF_dimer + MP2_dimer + correction_dimer
E_monomer1	-247.944	in h: HF_monomer1 + MP2_monomer1 + correction_monomer1
E_monomer2	-247.944	in h: HF_monomer2 + MP2_monomer2 + correction_monomer2
HF_part	-4.92053	kJ/mol: 2625.5*(HF_dimer-HF_monomer1-HF_monomer2)
MP2_part	-13.6011	kJ/mol: 2625.5*(MP2_dimer-MP2_monomer1-MP2_monomer2)
correction_part	1.03171	kJ/mol: 2625.5*(correction_dimer-correction_monomer1-correction_monomer2)
dE	-17.4899	kJ/mol: 2625.5*(E_dimer - E_monomer1 - E_monomer2)

## Sheet: 7
1-naphtol:water complex // MP2/aTZ
quantity (named in a self-explanatory way)	value	unit (with comments)
HF_dimer	-534.467	h (using the aQZ basis set)
HF_monomer1	-76.0656	h (using the aQZ basis set)
HF_monomer2	-458.394	h (using the aQZ basis set)
MP2aQZ_dimer	-2.22577	h (from the DLPNO approximation)
MP2aQZ_monomer1	-0.286613	h (from the DLPNO approximation)
MP2aQZ_monomer2	-1.93563	h (from the DLPNO approximation)
CCaQZ_dimer	-2.34244	h (from the DLPNO approximation)
CCaQZ_monomer1	-0.298413	h (from the DLPNO approximation)
CCaQZ_monomer2	-2.04062	h (from the DLPNO approximation)
CCaTZ_dimer	-2.23971	h (from the DLPNO approximation)
CCaTZ_monomer1	-0.282827	h (from the DLPNO approximation)
CCaTZ_monomer2	-1.95377	h (from the DLPNO approximation)
MP2aTZ_dimer	-2.10759	h (from the DLPNO approximation)
MP2aTZ_monomer1	-0.269314	h (from the DLPNO approximation)
MP2aTZ_monomer2	-1.83503	h (from the DLPNO approximation)
MP2_dimer	-2.31201	in h: (MP2aTZ_dimer*3^3 - MP2aQZ_dimer*4^3)/(3^3-4^3)
MP2_monomer1	-0.299236	in h: (MP2aTZ_monomer1*3^3 - MP2aQZ_monomer1*4^3)/(3^3-4^3)
MP2_monomer2	-2.00905	in h: (MP2aTZ_monomer2*3^3 - MP2aQZ_monomer2*4^3)/(3^3-4^3)
MP2correction_dimer	-2.31201	in h: (MP2aTZ_dimer*3^3 - MP2aQZ_dimer*4^3)/(3^3-4^3)
MP2correction_monomer1	-0.299236	in h: (MP2aTZ_monomer1*3^3 - MP2aQZ_monomer1*4^3)/(3^3-4^3)
MP2correction_monomer2	-2.00905	in h: (MP2aTZ_monomer2*3^3 - MP2aQZ_monomer2*4^3)/(3^3-4^3)
CCcorrection_dimer	-2.4174	in h: (CCaTZ_dimer*3^3 - CCaQZ_dimer*4^3)/(3^3-4^3)
CCcorrection_monomer1	-0.309786	in h: (CCaTZ_monomer1*3^3 - CCaQZ_monomer1*4^3)/(3^3-4^3)
CCcorrection_monomer2	-2.10399	in h: (CCaTZ_monomer2*3^3 - CCaQZ_monomer2*4^3)/(3^3-4^3)
correction_dimer	-0.105397	in h: CCcorrection_dimer - MP2correction_dimer
correction_monomer1	-0.0105495	in h: CCcorrection_monomer1 - MP2correction_monomer1
correction_monomer2	-0.0949392	in h: CCcorrection_monomer2 - MP2correction_monomer2
E_dimer	-536.885	in h: HF_dimer + MP2_dimer + correction_dimer
E_monomer1	-76.3754	in h: HF_monomer1 + MP2_monomer1 + correction_monomer1
E_monomer2	-460.498	in h: HF_monomer2 + MP2_monomer2 + correction_monomer2
HF_part	-20.3533	kJ/mol: 2625.5*(HF_dimer-HF_monomer1-HF_monomer2)
MP2_part	-9.77098	kJ/mol: 2625.5*(MP2_dimer-MP2_monomer1-MP2_monomer2)
correction_part	0.24123	kJ/mol: 2625.5*(correction_dimer-correction_monomer1-correction_monomer2)
dE	-29.883	kJ/mol: 2625.5*(E_dimer - E_monomer1 - E_monomer2)

## Sheet: 8
1-naphtol:NH3 complex // MP2/aTZ
quantity (named in a self-explanatory way)	value	unit (with comments)
HF_dimer	-514.627	h (using the aQZ basis set)
HF_monomer1	-56.2239	h (using the aQZ basis set)
HF_monomer2	-458.393	h (using the aQZ basis set)
MP2aQZ_dimer	-2.1958	h (from the DLPNO approximation)
MP2aQZ_monomer1	-0.254128	h (from the DLPNO approximation)
MP2aQZ_monomer2	-1.93608	h (from the DLPNO approximation)
CCaQZ_dimer	-2.31849	h (from the DLPNO approximation)
CCaQZ_monomer1	-0.272213	h (from the DLPNO approximation)
CCaQZ_monomer2	-2.04103	h (from the DLPNO approximation)
CCaTZ_dimer	-2.22007	h (from the DLPNO approximation)
CCaTZ_monomer1	-0.260954	h (from the DLPNO approximation)
CCaTZ_monomer2	-1.95425	h (from the DLPNO approximation)
MP2aTZ_dimer	-2.08157	h (from the DLPNO approximation)
MP2aTZ_monomer1	-0.240794	h (from the DLPNO approximation)
MP2aTZ_monomer2	-1.83555	h (from the DLPNO approximation)
MP2_dimer	-2.27916	in h: (MP2aTZ_dimer*3^3 - MP2aQZ_dimer*4^3)/(3^3-4^3)
MP2_monomer1	-0.263858	in h: (MP2aTZ_monomer1*3^3 - MP2aQZ_monomer1*4^3)/(3^3-4^3)
MP2_monomer2	-2.00944	in h: (MP2aTZ_monomer2*3^3 - MP2aQZ_monomer2*4^3)/(3^3-4^3)
MP2correction_dimer	-2.27916	in h: (MP2aTZ_dimer*3^3 - MP2aQZ_dimer*4^3)/(3^3-4^3)
MP2correction_monomer1	-0.263858	in h: (MP2aTZ_monomer1*3^3 - MP2aQZ_monomer1*4^3)/(3^3-4^3)
MP2correction_monomer2	-2.00944	in h: (MP2aTZ_monomer2*3^3 - MP2aQZ_monomer2*4^3)/(3^3-4^3)
CCcorrection_dimer	-2.39031	in h: (CCaTZ_dimer*3^3 - CCaQZ_dimer*4^3)/(3^3-4^3)
CCcorrection_monomer1	-0.280429	in h: (CCaTZ_monomer1*3^3 - CCaQZ_monomer1*4^3)/(3^3-4^3)
CCcorrection_monomer2	-2.10436	in h: (CCaTZ_monomer2*3^3 - CCaQZ_monomer2*4^3)/(3^3-4^3)
correction_dimer	-0.111158	in h: CCcorrection_dimer - MP2correction_dimer
correction_monomer1	-0.0165707	in h: CCcorrection_monomer1 - MP2correction_monomer1
correction_monomer2	-0.0949145	in h: CCcorrection_monomer2 - MP2correction_monomer2
E_dimer	-517.017	in h: HF_dimer + MP2_dimer + correction_dimer
E_monomer1	-56.5044	in h: HF_monomer1 + MP2_monomer1 + correction_monomer1
E_monomer2	-460.497	in h: HF_monomer2 + MP2_monomer2 + correction_monomer2
HF_part	-26.1242	kJ/mol: 2625.5*(HF_dimer-HF_monomer1-HF_monomer2)
MP2_part	-15.3776	kJ/mol: 2625.5*(MP2_dimer-MP2_monomer1-MP2_monomer2)
correction_part	0.859707	kJ/mol: 2625.5*(correction_dimer-correction_monomer1-correction_monomer2)
dE	-40.642	kJ/mol: 2625.5*(E_dimer - E_monomer1 - E_monomer2)

## Sheet: 9
HCl:HCl complex // MP2/aTZ
quantity (named in a self-explanatory way)	value	unit (with comments)
HF_dimer	-920.223	h (using the aQZ basis set)
HF_monomer1	-460.111	h (using the aQZ basis set)
HF_monomer2	-460.111	h (using the aQZ basis set)
MP2aQZ_dimer	-0.453093	h (from the DLPNO approximation)
MP2aQZ_monomer1	-0.224843	h (from the DLPNO approximation)
MP2aQZ_monomer2	-0.224944	h (from the DLPNO approximation)
CCaQZ_dimer	-0.509428	h (from the DLPNO approximation)
CCaQZ_monomer1	-0.253329	h (from the DLPNO approximation)
CCaQZ_monomer2	-0.253285	h (from the DLPNO approximation)
CCaTZ_dimer	-0.475237	h (from the DLPNO approximation)
CCaTZ_monomer1	-0.236253	h (from the DLPNO approximation)
CCaTZ_monomer2	-0.236399	h (from the DLPNO approximation)
MP2aTZ_dimer	-0.418798	h (from the DLPNO approximation)
MP2aTZ_monomer1	-0.207768	h (from the DLPNO approximation)
MP2aTZ_monomer2	-0.207933	h (from the DLPNO approximation)
MP2_dimer	-0.478119	in h: (MP2aTZ_dimer*3^3 - MP2aQZ_dimer*4^3)/(3^3-4^3)
MP2_monomer1	-0.237304	in h: (MP2aTZ_monomer1*3^3 - MP2aQZ_monomer1*4^3)/(3^3-4^3)
MP2_monomer2	-0.237358	in h: (MP2aTZ_monomer2*3^3 - MP2aQZ_monomer2*4^3)/(3^3-4^3)
MP2correction_dimer	-0.478119	in h: (MP2aTZ_dimer*3^3 - MP2aQZ_dimer*4^3)/(3^3-4^3)
MP2correction_monomer1	-0.237304	in h: (MP2aTZ_monomer1*3^3 - MP2aQZ_monomer1*4^3)/(3^3-4^3)
MP2correction_monomer2	-0.237358	in h: (MP2aTZ_monomer2*3^3 - MP2aQZ_monomer2*4^3)/(3^3-4^3)
CCcorrection_dimer	-0.534379	in h: (CCaTZ_dimer*3^3 - CCaQZ_dimer*4^3)/(3^3-4^3)
CCcorrection_monomer1	-0.265789	in h: (CCaTZ_monomer1*3^3 - CCaQZ_monomer1*4^3)/(3^3-4^3)
CCcorrection_monomer2	-0.265607	in h: (CCaTZ_monomer2*3^3 - CCaQZ_monomer2*4^3)/(3^3-4^3)
correction_dimer	-0.0562592	in h: CCcorrection_dimer - MP2correction_dimer
correction_monomer1	-0.0284852	in h: CCcorrection_monomer1 - MP2correction_monomer1
correction_monomer2	-0.0282492	in h: CCcorrection_monomer2 - MP2correction_monomer2
E_dimer	-920.757	in h: HF_dimer + MP2_dimer + correction_dimer
E_monomer1	-460.377	in h: HF_monomer1 + MP2_monomer1 + correction_monomer1
E_monomer2	-460.377	in h: HF_monomer2 + MP2_monomer2 + correction_monomer2
HF_part	-0.319051	kJ/mol: 2625.5*(HF_dimer-HF_monomer1-HF_monomer2)
MP2_part	-9.07656	kJ/mol: 2625.5*(MP2_dimer-MP2_monomer1-MP2_monomer2)
correction_part	1.24744	kJ/mol: 2625.5*(correction_dimer-correction_monomer1-correction_monomer2)
dE	-8.14817	kJ/mol: 2625.5*(E_dimer - E_monomer1 - E_monomer2)

## Sheet: 10
acetylene:acetylene complex (T-shaped) // MP2/aTZ
quantity (named in a self-explanatory way)	value	unit (with comments)
HF_dimer	-153.707	h (using the aQZ basis set)
HF_monomer1	-76.8534	h (using the aQZ basis set)
HF_monomer2	-76.8533	h (using the aQZ basis set)
MP2aQZ_dimer	-0.667016	h (from the DLPNO approximation)
MP2aQZ_monomer1	-0.332468	h (from the DLPNO approximation)
MP2aQZ_monomer2	-0.332457	h (from the DLPNO approximation)
CCaQZ_dimer	-0.717498	h (from the DLPNO approximation)
CCaQZ_monomer1	-0.357819	h (from the DLPNO approximation)
CCaQZ_monomer2	-0.357848	h (from the DLPNO approximation)
CCaTZ_dimer	-0.688994	h (from the DLPNO approximation)
CCaTZ_monomer1	-0.343629	h (from the DLPNO approximation)
CCaTZ_monomer2	-0.343629	h (from the DLPNO approximation)
MP2aTZ_dimer	-0.632636	h (from the DLPNO approximation)
MP2aTZ_monomer1	-0.31533	h (from the DLPNO approximation)
MP2aTZ_monomer2	-0.315307	h (from the DLPNO approximation)
MP2_dimer	-0.692103	in h: (MP2aTZ_dimer*3^3 - MP2aQZ_dimer*4^3)/(3^3-4^3)
MP2_monomer1	-0.344973	in h: (MP2aTZ_monomer1*3^3 - MP2aQZ_monomer1*4^3)/(3^3-4^3)
MP2_monomer2	-0.344973	in h: (MP2aTZ_monomer2*3^3 - MP2aQZ_monomer2*4^3)/(3^3-4^3)
MP2correction_dimer	-0.692103	in h: (MP2aTZ_dimer*3^3 - MP2aQZ_dimer*4^3)/(3^3-4^3)
MP2correction_monomer1	-0.344973	in h: (MP2aTZ_monomer1*3^3 - MP2aQZ_monomer1*4^3)/(3^3-4^3)
MP2correction_monomer2	-0.344973	in h: (MP2aTZ_monomer2*3^3 - MP2aQZ_monomer2*4^3)/(3^3-4^3)
CCcorrection_dimer	-0.738299	in h: (CCaTZ_dimer*3^3 - CCaQZ_dimer*4^3)/(3^3-4^3)
CCcorrection_monomer1	-0.368175	in h: (CCaTZ_monomer1*3^3 - CCaQZ_monomer1*4^3)/(3^3-4^3)
CCcorrection_monomer2	-0.368224	in h: (CCaTZ_monomer2*3^3 - CCaQZ_monomer2*4^3)/(3^3-4^3)
correction_dimer	-0.0461953	in h: CCcorrection_dimer - MP2correction_dimer
correction_monomer1	-0.0232012	in h: CCcorrection_monomer1 - MP2correction_monomer1
correction_monomer2	-0.0232509	in h: CCcorrection_monomer2 - MP2correction_monomer2
E_dimer	-154.445	in h: HF_dimer + MP2_dimer + correction_dimer
E_monomer1	-77.2216	in h: HF_monomer1 + MP2_monomer1 + correction_monomer1
E_monomer2	-77.2215	in h: HF_monomer2 + MP2_monomer2 + correction_monomer2
HF_part	-1.26825	kJ/mol: 2625.5*(HF_dimer-HF_monomer1-HF_monomer2)
MP2_part	-5.66344	kJ/mol: 2625.5*(MP2_dimer-MP2_monomer1-MP2_monomer2)
correction_part	0.67437	kJ/mol: 2625.5*(correction_dimer-correction_monomer1-correction_monomer2)
dE	-6.25732	kJ/mol: 2625.5*(E_dimer - E_monomer1 - E_monomer2)

[truncated: 40 more sheets: 11, 12, 13, 14, 15, 16, 17, 18, 19, 20, 21, 22, 23, 24, 25, 26, 27, 28, 29, 30 …]
