# Supplementary material for: Reliable Dimerization Energies for Modeling of Supramolecular Junctions
Source: Int J Mol Sci. 2024 Jan 2;25(1):602. doi: 10.3390/ijms25010602 (PMC10778993; doi:10.3390/ijms25010602)
Supplement: Supplementary file 1 [file ijms-25-00602-s001.zip › DLPNO_miscellaneous.xlsx]

## Sheet: S01
ammonia dimer in the geometry from the S22 set (see http://www.begdb.org/)
quantity (named in a self-explanatory way)	value	unit (with comments)
HF_dimer	-112.45	h (using the aQZ basis set)
HF_monomer1	-56.2239	h (using the aQZ basis set)
HF_monomer2	-56.2239	h (using the aQZ basis set)
MP2aQZ_dimer	-0.51055	h (from the DLPNO approximation)
MP2aQZ_monomer1	-0.253936	h (from the DLPNO approximation)
MP2aQZ_monomer2	-0.253936	h (from the DLPNO approximation)
CCaQZ_dimer	-0.546274	h (from the DLPNO approximation)
CCaQZ_monomer1	-0.271833	h (from the DLPNO approximation)
CCaQZ_monomer2	-0.271833	h (from the DLPNO approximation)
CCaTZ_dimer	-0.523223	h (from the DLPNO approximation)
CCaTZ_monomer1	-0.260382	h (from the DLPNO approximation)
CCaTZ_monomer2	-0.260382	h (from the DLPNO approximation)
MP2aTZ_dimer	-0.483426	h (from the DLPNO approximation)
MP2aTZ_monomer1	-0.240445	h (from the DLPNO approximation)
MP2aTZ_monomer2	-0.240445	h (from the DLPNO approximation)
MP2_dimer	-0.530343	in h: (MP2aTZ_dimer*3^3 - MP2aQZ_dimer*4^3)/(3^3-4^3)
MP2_monomer1	-0.26378	in h: (MP2aTZ_monomer1*3^3 - MP2aQZ_monomer1*4^3)/(3^3-4^3)
MP2_monomer2	-0.26378	in h: (MP2aTZ_monomer2*3^3 - MP2aQZ_monomer2*4^3)/(3^3-4^3)
MP2correction_dimer	-0.530343	in h: (MP2aTZ_dimer*3^3 - MP2aQZ_dimer*4^3)/(3^3-4^3)
MP2correction_monomer1	-0.26378	in h: (MP2aTZ_monomer1*3^3 - MP2aQZ_monomer1*4^3)/(3^3-4^3)
MP2correction_monomer2	-0.26378	in h: (MP2aTZ_monomer2*3^3 - MP2aQZ_monomer2*4^3)/(3^3-4^3)
CCcorrection_dimer	-0.563096	in h: (CCaTZ_dimer*3^3 - CCaQZ_dimer*4^3)/(3^3-4^3)
CCcorrection_monomer1	-0.28019	in h: (CCaTZ_monomer1*3^3 - CCaQZ_monomer1*4^3)/(3^3-4^3)
CCcorrection_monomer2	-0.28019	in h: (CCaTZ_monomer2*3^3 - CCaQZ_monomer2*4^3)/(3^3-4^3)
correction_dimer	-0.0327528	in h: CCcorrection_dimer - MP2correction_dimer
correction_monomer1	-0.0164101	in h: CCcorrection_monomer1 - MP2correction_monomer1
correction_monomer2	-0.0164101	in h: CCcorrection_monomer2 - MP2correction_monomer2
E_dimer	-113.013	in h: HF_dimer + MP2_dimer + correction_dimer
E_monomer1	-56.5041	in h: HF_monomer1 + MP2_monomer1 + correction_monomer1
E_monomer2	-56.5041	in h: HF_monomer2 + MP2_monomer2 + correction_monomer2
HF_part	-5.88417	kJ/mol: 2625.5*(HF_dimer-HF_monomer1-HF_monomer2)
MP2_part	-7.30669	kJ/mol: 2625.5*(MP2_dimer-MP2_monomer1-MP2_monomer2)
correction_part	0.176637	kJ/mol: 2625.5*(correction_dimer-correction_monomer1-correction_monomer2)
dE	-13.0142	kJ/mol: 2625.5*(E_dimer - E_monomer1 - E_monomer2)

## Sheet: S02
water dimer in the geometry from the S22 set (see http://www.begdb.org/)
quantity (named in a self-explanatory way)	value	unit (with comments)
HF_dimer	-152.137	h (using the aQZ basis set)
HF_monomer1	-76.0659	h (using the aQZ basis set)
HF_monomer2	-76.0657	h (using the aQZ basis set)
MP2aQZ_dimer	-0.574535	h (from the DLPNO approximation)
MP2aQZ_monomer1	-0.286243	h (from the DLPNO approximation)
MP2aQZ_monomer2	-0.286271	h (from the DLPNO approximation)
CCaQZ_dimer	-0.597507	h (from the DLPNO approximation)
CCaQZ_monomer1	-0.297723	h (from the DLPNO approximation)
CCaQZ_monomer2	-0.297771	h (from the DLPNO approximation)
CCaTZ_dimer	-0.56584	h (from the DLPNO approximation)
CCaTZ_monomer1	-0.282008	h (from the DLPNO approximation)
CCaTZ_monomer2	-0.282055	h (from the DLPNO approximation)
MP2aTZ_dimer	-0.539503	h (from the DLPNO approximation)
MP2aTZ_monomer1	-0.268824	h (from the DLPNO approximation)
MP2aTZ_monomer2	-0.268867	h (from the DLPNO approximation)
MP2_dimer	-0.600099	in h: (MP2aTZ_dimer*3^3 - MP2aQZ_dimer*4^3)/(3^3-4^3)
MP2_monomer1	-0.298955	in h: (MP2aTZ_monomer1*3^3 - MP2aQZ_monomer1*4^3)/(3^3-4^3)
MP2_monomer2	-0.298971	in h: (MP2aTZ_monomer2*3^3 - MP2aQZ_monomer2*4^3)/(3^3-4^3)
MP2correction_dimer	-0.600099	in h: (MP2aTZ_dimer*3^3 - MP2aQZ_dimer*4^3)/(3^3-4^3)
MP2correction_monomer1	-0.298955	in h: (MP2aTZ_monomer1*3^3 - MP2aQZ_monomer1*4^3)/(3^3-4^3)
MP2correction_monomer2	-0.298971	in h: (MP2aTZ_monomer2*3^3 - MP2aQZ_monomer2*4^3)/(3^3-4^3)
CCcorrection_dimer	-0.620616	in h: (CCaTZ_dimer*3^3 - CCaQZ_dimer*4^3)/(3^3-4^3)
CCcorrection_monomer1	-0.309191	in h: (CCaTZ_monomer1*3^3 - CCaQZ_monomer1*4^3)/(3^3-4^3)
CCcorrection_monomer2	-0.30924	in h: (CCaTZ_monomer2*3^3 - CCaQZ_monomer2*4^3)/(3^3-4^3)
correction_dimer	-0.0205171	in h: CCcorrection_dimer - MP2correction_dimer
correction_monomer1	-0.0102361	in h: CCcorrection_monomer1 - MP2correction_monomer1
correction_monomer2	-0.0102689	in h: CCcorrection_monomer2 - MP2correction_monomer2
E_dimer	-152.758	in h: HF_dimer + MP2_dimer + correction_dimer
E_monomer1	-76.3751	in h: HF_monomer1 + MP2_monomer1 + correction_monomer1
E_monomer2	-76.375	in h: HF_monomer2 + MP2_monomer2 + correction_monomer2
HF_part	-15.001	kJ/mol: 2625.5*(HF_dimer-HF_monomer1-HF_monomer2)
MP2_part	-5.70462	kJ/mol: 2625.5*(MP2_dimer-MP2_monomer1-MP2_monomer2)
correction_part	-0.0315734	kJ/mol: 2625.5*(correction_dimer-correction_monomer1-correction_monomer2)
dE	-20.7372	kJ/mol: 2625.5*(E_dimer - E_monomer1 - E_monomer2)

## Sheet: S03
formic acid dimer in the geometry from the S22 set (see http://www.begdb.org/)
quantity (named in a self-explanatory way)	value	unit (with comments)
HF_dimer	-377.731	h (using the aQZ basis set)
HF_monomer1	-188.853	h (using the aQZ basis set)
HF_monomer2	-188.853	h (using the aQZ basis set)
MP2aQZ_dimer	-1.37599	h (from the DLPNO approximation)
MP2aQZ_monomer1	-0.685738	h (from the DLPNO approximation)
MP2aQZ_monomer2	-0.685738	h (from the DLPNO approximation)
CCaQZ_dimer	-1.4273	h (from the DLPNO approximation)
CCaQZ_monomer1	-0.711343	h (from the DLPNO approximation)
CCaQZ_monomer2	-0.711343	h (from the DLPNO approximation)
CCaTZ_dimer	-1.35252	h (from the DLPNO approximation)
CCaTZ_monomer1	-0.674414	h (from the DLPNO approximation)
CCaTZ_monomer2	-0.674414	h (from the DLPNO approximation)
MP2aTZ_dimer	-1.29343	h (from the DLPNO approximation)
MP2aTZ_monomer1	-0.644855	h (from the DLPNO approximation)
MP2aTZ_monomer2	-0.644855	h (from the DLPNO approximation)
MP2_dimer	-1.43624	in h: (MP2aTZ_dimer*3^3 - MP2aQZ_dimer*4^3)/(3^3-4^3)
MP2_monomer1	-0.715572	in h: (MP2aTZ_monomer1*3^3 - MP2aQZ_monomer1*4^3)/(3^3-4^3)
MP2_monomer2	-0.715572	in h: (MP2aTZ_monomer2*3^3 - MP2aQZ_monomer2*4^3)/(3^3-4^3)
MP2correction_dimer	-1.43624	in h: (MP2aTZ_dimer*3^3 - MP2aQZ_dimer*4^3)/(3^3-4^3)
MP2correction_monomer1	-0.715572	in h: (MP2aTZ_monomer1*3^3 - MP2aQZ_monomer1*4^3)/(3^3-4^3)
MP2correction_monomer2	-0.715572	in h: (MP2aTZ_monomer2*3^3 - MP2aQZ_monomer2*4^3)/(3^3-4^3)
CCcorrection_dimer	-1.48187	in h: (CCaTZ_dimer*3^3 - CCaQZ_dimer*4^3)/(3^3-4^3)
CCcorrection_monomer1	-0.738291	in h: (CCaTZ_monomer1*3^3 - CCaQZ_monomer1*4^3)/(3^3-4^3)
CCcorrection_monomer2	-0.738291	in h: (CCaTZ_monomer2*3^3 - CCaQZ_monomer2*4^3)/(3^3-4^3)
correction_dimer	-0.0456364	in h: CCcorrection_dimer - MP2correction_dimer
correction_monomer1	-0.022719	in h: CCcorrection_monomer1 - MP2correction_monomer1
correction_monomer2	-0.022719	in h: CCcorrection_monomer2 - MP2correction_monomer2
E_dimer	-379.213	in h: HF_dimer + MP2_dimer + correction_dimer
E_monomer1	-189.592	in h: HF_monomer1 + MP2_monomer1 + correction_monomer1
E_monomer2	-189.592	in h: HF_monomer2 + MP2_monomer2 + correction_monomer2
HF_part	-63.9494	kJ/mol: 2625.5*(HF_dimer-HF_monomer1-HF_monomer2)
MP2_part	-13.3685	kJ/mol: 2625.5*(MP2_dimer-MP2_monomer1-MP2_monomer2)
correction_part	-0.520802	kJ/mol: 2625.5*(correction_dimer-correction_monomer1-correction_monomer2)
dE	-77.8386	kJ/mol: 2625.5*(E_dimer - E_monomer1 - E_monomer2)

## Sheet: S04
formamide dimer in the geometry from the S22 set (see http://www.begdb.org/)
quantity (named in a self-explanatory way)	value	unit (with comments)
HF_dimer	-338.047	h (using the aQZ basis set)
HF_monomer1	-169.014	h (using the aQZ basis set)
HF_monomer2	-169.014	h (using the aQZ basis set)
MP2aQZ_dimer	-1.31571	h (from the DLPNO approximation)
MP2aQZ_monomer1	-0.65525	h (from the DLPNO approximation)
MP2aQZ_monomer2	-0.65525	h (from the DLPNO approximation)
CCaQZ_dimer	-1.37727	h (from the DLPNO approximation)
CCaQZ_monomer1	-0.68593	h (from the DLPNO approximation)
CCaQZ_monomer2	-0.68593	h (from the DLPNO approximation)
CCaTZ_dimer	-1.31048	h (from the DLPNO approximation)
CCaTZ_monomer1	-0.652873	h (from the DLPNO approximation)
CCaTZ_monomer2	-0.652873	h (from the DLPNO approximation)
MP2aTZ_dimer	-1.24048	h (from the DLPNO approximation)
MP2aTZ_monomer1	-0.617932	h (from the DLPNO approximation)
MP2aTZ_monomer2	-0.617932	h (from the DLPNO approximation)
MP2_dimer	-1.37061	in h: (MP2aTZ_dimer*3^3 - MP2aQZ_dimer*4^3)/(3^3-4^3)
MP2_monomer1	-0.682483	in h: (MP2aTZ_monomer1*3^3 - MP2aQZ_monomer1*4^3)/(3^3-4^3)
MP2_monomer2	-0.682483	in h: (MP2aTZ_monomer2*3^3 - MP2aQZ_monomer2*4^3)/(3^3-4^3)
MP2correction_dimer	-1.37061	in h: (MP2aTZ_dimer*3^3 - MP2aQZ_dimer*4^3)/(3^3-4^3)
MP2correction_monomer1	-0.682483	in h: (MP2aTZ_monomer1*3^3 - MP2aQZ_monomer1*4^3)/(3^3-4^3)
MP2correction_monomer2	-0.682483	in h: (MP2aTZ_monomer2*3^3 - MP2aQZ_monomer2*4^3)/(3^3-4^3)
CCcorrection_dimer	-1.42601	in h: (CCaTZ_dimer*3^3 - CCaQZ_dimer*4^3)/(3^3-4^3)
CCcorrection_monomer1	-0.710053	in h: (CCaTZ_monomer1*3^3 - CCaQZ_monomer1*4^3)/(3^3-4^3)
CCcorrection_monomer2	-0.710053	in h: (CCaTZ_monomer2*3^3 - CCaQZ_monomer2*4^3)/(3^3-4^3)
correction_dimer	-0.0554009	in h: CCcorrection_dimer - MP2correction_dimer
correction_monomer1	-0.0275707	in h: CCcorrection_monomer1 - MP2correction_monomer1
correction_monomer2	-0.0275707	in h: CCcorrection_monomer2 - MP2correction_monomer2
E_dimer	-339.473	in h: HF_dimer + MP2_dimer + correction_dimer
E_monomer1	-169.724	in h: HF_monomer1 + MP2_monomer1 + correction_monomer1
E_monomer2	-169.724	in h: HF_monomer2 + MP2_monomer2 + correction_monomer2
HF_part	-50.9859	kJ/mol: 2625.5*(HF_dimer-HF_monomer1-HF_monomer2)
MP2_part	-14.8101	kJ/mol: 2625.5*(MP2_dimer-MP2_monomer1-MP2_monomer2)
correction_part	-0.681215	kJ/mol: 2625.5*(correction_dimer-correction_monomer1-correction_monomer2)
dE	-66.4772	kJ/mol: 2625.5*(E_dimer - E_monomer1 - E_monomer2)

## Sheet: S05
uracil dimer (H-bonded configuration) in the geometry from the S22 set (see http://www.begdb.org/)
quantity (named in a self-explanatory way)	value	unit (with comments)
HF_dimer	-825.322	h (using the aQZ basis set)
HF_monomer1	-412.648	h (using the aQZ basis set)
HF_monomer2	-412.648	h (using the aQZ basis set)
MP2aQZ_dimer	-3.18979	h (from the DLPNO approximation)
MP2aQZ_monomer1	-1.59191	h (from the DLPNO approximation)
MP2aQZ_monomer2	-1.59191	h (from the DLPNO approximation)
CCaQZ_dimer	-3.32604	h (from the DLPNO approximation)
CCaQZ_monomer1	-1.66005	h (from the DLPNO approximation)
CCaQZ_monomer2	-1.66005	h (from the DLPNO approximation)
CCaTZ_dimer	-3.16688	h (from the DLPNO approximation)
CCaTZ_monomer1	-1.58081	h (from the DLPNO approximation)
CCaTZ_monomer2	-1.58081	h (from the DLPNO approximation)
MP2aTZ_dimer	-3.0108	h (from the DLPNO approximation)
MP2aTZ_monomer1	-1.50271	h (from the DLPNO approximation)
MP2aTZ_monomer2	-1.50271	h (from the DLPNO approximation)
MP2_dimer	-3.32041	in h: (MP2aTZ_dimer*3^3 - MP2aQZ_dimer*4^3)/(3^3-4^3)
MP2_monomer1	-1.65701	in h: (MP2aTZ_monomer1*3^3 - MP2aQZ_monomer1*4^3)/(3^3-4^3)
MP2_monomer2	-1.65701	in h: (MP2aTZ_monomer2*3^3 - MP2aQZ_monomer2*4^3)/(3^3-4^3)
MP2correction_dimer	-3.32041	in h: (MP2aTZ_dimer*3^3 - MP2aQZ_dimer*4^3)/(3^3-4^3)
MP2correction_monomer1	-1.65701	in h: (MP2aTZ_monomer1*3^3 - MP2aQZ_monomer1*4^3)/(3^3-4^3)
MP2correction_monomer2	-1.65701	in h: (MP2aTZ_monomer2*3^3 - MP2aQZ_monomer2*4^3)/(3^3-4^3)
CCcorrection_dimer	-3.44219	in h: (CCaTZ_dimer*3^3 - CCaQZ_dimer*4^3)/(3^3-4^3)
CCcorrection_monomer1	-1.71787	in h: (CCaTZ_monomer1*3^3 - CCaQZ_monomer1*4^3)/(3^3-4^3)
CCcorrection_monomer2	-1.71787	in h: (CCaTZ_monomer2*3^3 - CCaQZ_monomer2*4^3)/(3^3-4^3)
correction_dimer	-0.121777	in h: CCcorrection_dimer - MP2correction_dimer
correction_monomer1	-0.0608562	in h: CCcorrection_monomer1 - MP2correction_monomer1
correction_monomer2	-0.0608562	in h: CCcorrection_monomer2 - MP2correction_monomer2
E_dimer	-828.764	in h: HF_dimer + MP2_dimer + correction_dimer
E_monomer1	-414.366	in h: HF_monomer1 + MP2_monomer1 + correction_monomer1
E_monomer2	-414.366	in h: HF_monomer2 + MP2_monomer2 + correction_monomer2
HF_part	-68.086	kJ/mol: 2625.5*(HF_dimer-HF_monomer1-HF_monomer2)
MP2_part	-16.7792	kJ/mol: 2625.5*(MP2_dimer-MP2_monomer1-MP2_monomer2)
correction_part	-0.169932	kJ/mol: 2625.5*(correction_dimer-correction_monomer1-correction_monomer2)
dE	-85.0352	kJ/mol: 2625.5*(E_dimer - E_monomer1 - E_monomer2)

## Sheet: S06
2-pyridoxine:2-aminopyridine in the geometry from the S22 set (see http://www.begdb.org/)
quantity (named in a self-explanatory way)	value	unit (with comments)
HF_dimer	-623.578	h (using the aQZ basis set)
HF_monomer1	-301.861	h (using the aQZ basis set)
HF_monomer2	-321.7	h (using the aQZ basis set)
MP2aQZ_dimer	-2.59973	h (from the DLPNO approximation)
MP2aQZ_monomer1	-1.28044	h (from the DLPNO approximation)
MP2aQZ_monomer2	-1.30889	h (from the DLPNO approximation)
CCaQZ_dimer	-2.73525	h (from the DLPNO approximation)
CCaQZ_monomer1	-1.35	h (from the DLPNO approximation)
CCaQZ_monomer2	-1.37557	h (from the DLPNO approximation)
CCaTZ_dimer	-2.61654	h (from the DLPNO approximation)
CCaTZ_monomer1	-1.293	h (from the DLPNO approximation)
CCaTZ_monomer2	-1.3145	h (from the DLPNO approximation)
MP2aTZ_dimer	-2.46272	h (from the DLPNO approximation)
MP2aTZ_monomer1	-1.21408	h (from the DLPNO approximation)
MP2aTZ_monomer2	-1.23879	h (from the DLPNO approximation)
MP2_dimer	-2.69971	in h: (MP2aTZ_dimer*3^3 - MP2aQZ_dimer*4^3)/(3^3-4^3)
MP2_monomer1	-1.32886	in h: (MP2aTZ_monomer1*3^3 - MP2aQZ_monomer1*4^3)/(3^3-4^3)
MP2_monomer2	-1.36004	in h: (MP2aTZ_monomer2*3^3 - MP2aQZ_monomer2*4^3)/(3^3-4^3)
MP2correction_dimer	-2.69971	in h: (MP2aTZ_dimer*3^3 - MP2aQZ_dimer*4^3)/(3^3-4^3)
MP2correction_monomer1	-1.32886	in h: (MP2aTZ_monomer1*3^3 - MP2aQZ_monomer1*4^3)/(3^3-4^3)
MP2correction_monomer2	-1.36004	in h: (MP2aTZ_monomer2*3^3 - MP2aQZ_monomer2*4^3)/(3^3-4^3)
CCcorrection_dimer	-2.82188	in h: (CCaTZ_dimer*3^3 - CCaQZ_dimer*4^3)/(3^3-4^3)
CCcorrection_monomer1	-1.39159	in h: (CCaTZ_monomer1*3^3 - CCaQZ_monomer1*4^3)/(3^3-4^3)
CCcorrection_monomer2	-1.42014	in h: (CCaTZ_monomer2*3^3 - CCaQZ_monomer2*4^3)/(3^3-4^3)
correction_dimer	-0.122172	in h: CCcorrection_dimer - MP2correction_dimer
correction_monomer1	-0.0627322	in h: CCcorrection_monomer1 - MP2correction_monomer1
correction_monomer2	-0.0600955	in h: CCcorrection_monomer2 - MP2correction_monomer2
E_dimer	-626.4	in h: HF_dimer + MP2_dimer + correction_dimer
E_monomer1	-303.253	in h: HF_monomer1 + MP2_monomer1 + correction_monomer1
E_monomer2	-323.12	in h: HF_monomer2 + MP2_monomer2 + correction_monomer2
HF_part	-43.8464	kJ/mol: 2625.5*(HF_dimer-HF_monomer1-HF_monomer2)
MP2_part	-28.3759	kJ/mol: 2625.5*(MP2_dimer-MP2_monomer1-MP2_monomer2)
correction_part	1.72032	kJ/mol: 2625.5*(correction_dimer-correction_monomer1-correction_monomer2)
dE	-70.502	kJ/mol: 2625.5*(E_dimer - E_monomer1 - E_monomer2)

## Sheet: S07
adenine:thymine (H-bonded configuration) in the geometry from the S22 set (see http://www.begdb.org/)
quantity (named in a self-explanatory way)	value	unit (with comments)
HF_dimer	-916.428	h (using the aQZ basis set)
HF_monomer1	-451.701	h (using the aQZ basis set)
HF_monomer2	-464.711	h (using the aQZ basis set)
MP2aQZ_dimer	-3.69308	h (from the DLPNO approximation)
MP2aQZ_monomer1	-1.78151	h (from the DLPNO approximation)
MP2aQZ_monomer2	-1.90181	h (from the DLPNO approximation)
CCaQZ_dimer	-3.85408	h (from the DLPNO approximation)
CCaQZ_monomer1	-1.86426	h (from the DLPNO approximation)
CCaQZ_monomer2	-1.98031	h (from the DLPNO approximation)
CCaTZ_dimer	-3.67927	h (from the DLPNO approximation)
CCaTZ_monomer1	-1.77776	h (from the DLPNO approximation)
CCaTZ_monomer2	-1.89265	h (from the DLPNO approximation)
MP2aTZ_dimer	-3.49405	h (from the DLPNO approximation)
MP2aTZ_monomer1	-1.68346	h (from the DLPNO approximation)
MP2aTZ_monomer2	-1.80141	h (from the DLPNO approximation)
MP2_dimer	-3.83832	in h: (MP2aTZ_dimer*3^3 - MP2aQZ_dimer*4^3)/(3^3-4^3)
MP2_monomer1	-1.85305	in h: (MP2aTZ_monomer1*3^3 - MP2aQZ_monomer1*4^3)/(3^3-4^3)
MP2_monomer2	-1.97509	in h: (MP2aTZ_monomer2*3^3 - MP2aQZ_monomer2*4^3)/(3^3-4^3)
MP2correction_dimer	-3.83832	in h: (MP2aTZ_dimer*3^3 - MP2aQZ_dimer*4^3)/(3^3-4^3)
MP2correction_monomer1	-1.85305	in h: (MP2aTZ_monomer1*3^3 - MP2aQZ_monomer1*4^3)/(3^3-4^3)
MP2correction_monomer2	-1.97509	in h: (MP2aTZ_monomer2*3^3 - MP2aQZ_monomer2*4^3)/(3^3-4^3)
CCcorrection_dimer	-3.98164	in h: (CCaTZ_dimer*3^3 - CCaQZ_dimer*4^3)/(3^3-4^3)
CCcorrection_monomer1	-1.92738	in h: (CCaTZ_monomer1*3^3 - CCaQZ_monomer1*4^3)/(3^3-4^3)
CCcorrection_monomer2	-2.04429	in h: (CCaTZ_monomer2*3^3 - CCaQZ_monomer2*4^3)/(3^3-4^3)
correction_dimer	-0.143319	in h: CCcorrection_dimer - MP2correction_dimer
correction_monomer1	-0.0743264	in h: CCcorrection_monomer1 - MP2correction_monomer1
correction_monomer2	-0.0692014	in h: CCcorrection_monomer2 - MP2correction_monomer2
E_dimer	-920.41	in h: HF_dimer + MP2_dimer + correction_dimer
E_monomer1	-453.629	in h: HF_monomer1 + MP2_monomer1 + correction_monomer1
E_monomer2	-466.755	in h: HF_monomer2 + MP2_monomer2 + correction_monomer2
HF_part	-42.0887	kJ/mol: 2625.5*(HF_dimer-HF_monomer1-HF_monomer2)
MP2_part	-26.74	kJ/mol: 2625.5*(MP2_dimer-MP2_monomer1-MP2_monomer2)
correction_part	0.547809	kJ/mol: 2625.5*(correction_dimer-correction_monomer1-correction_monomer2)
dE	-68.2809	kJ/mol: 2625.5*(E_dimer - E_monomer1 - E_monomer2)

## Sheet: S08
methane dimer in the geometry from the S22 set (see http://www.begdb.org/)
quantity (named in a self-explanatory way)	value	unit (with comments)
HF_dimer	-80.4318	h (using the aQZ basis set)
HF_monomer1	-40.2162	h (using the aQZ basis set)
HF_monomer2	-40.2162	h (using the aQZ basis set)
MP2aQZ_dimer	-0.423665	h (from the DLPNO approximation)
MP2aQZ_monomer1	-0.21116	h (from the DLPNO approximation)
MP2aQZ_monomer2	-0.21116	h (from the DLPNO approximation)
CCaQZ_dimer	-0.472566	h (from the DLPNO approximation)
CCaQZ_monomer1	-0.235596	h (from the DLPNO approximation)
CCaQZ_monomer2	-0.235596	h (from the DLPNO approximation)
CCaTZ_dimer	-0.456226	h (from the DLPNO approximation)
CCaTZ_monomer1	-0.227441	h (from the DLPNO approximation)
CCaTZ_monomer2	-0.227441	h (from the DLPNO approximation)
MP2aTZ_dimer	-0.403174	h (from the DLPNO approximation)
MP2aTZ_monomer1	-0.20093	h (from the DLPNO approximation)
MP2aTZ_monomer2	-0.20093	h (from the DLPNO approximation)
MP2_dimer	-0.438618	in h: (MP2aTZ_dimer*3^3 - MP2aQZ_dimer*4^3)/(3^3-4^3)
MP2_monomer1	-0.218625	in h: (MP2aTZ_monomer1*3^3 - MP2aQZ_monomer1*4^3)/(3^3-4^3)
MP2_monomer2	-0.218625	in h: (MP2aTZ_monomer2*3^3 - MP2aQZ_monomer2*4^3)/(3^3-4^3)
MP2correction_dimer	-0.438618	in h: (MP2aTZ_dimer*3^3 - MP2aQZ_dimer*4^3)/(3^3-4^3)
MP2correction_monomer1	-0.218625	in h: (MP2aTZ_monomer1*3^3 - MP2aQZ_monomer1*4^3)/(3^3-4^3)
MP2correction_monomer2	-0.218625	in h: (MP2aTZ_monomer2*3^3 - MP2aQZ_monomer2*4^3)/(3^3-4^3)
CCcorrection_dimer	-0.48449	in h: (CCaTZ_dimer*3^3 - CCaQZ_dimer*4^3)/(3^3-4^3)
CCcorrection_monomer1	-0.241547	in h: (CCaTZ_monomer1*3^3 - CCaQZ_monomer1*4^3)/(3^3-4^3)
CCcorrection_monomer2	-0.241547	in h: (CCaTZ_monomer2*3^3 - CCaQZ_monomer2*4^3)/(3^3-4^3)
correction_dimer	-0.0458723	in h: CCcorrection_dimer - MP2correction_dimer
correction_monomer1	-0.0229224	in h: CCcorrection_monomer1 - MP2correction_monomer1
correction_monomer2	-0.0229224	in h: CCcorrection_monomer2 - MP2correction_monomer2
E_dimer	-80.9163	in h: HF_dimer + MP2_dimer + correction_dimer
E_monomer1	-40.4578	in h: HF_monomer1 + MP2_monomer1 + correction_monomer1
E_monomer2	-40.4578	in h: HF_monomer2 + MP2_monomer2 + correction_monomer2
HF_part	1.53513	kJ/mol: 2625.5*(HF_dimer-HF_monomer1-HF_monomer2)
MP2_part	-3.59075	kJ/mol: 2625.5*(MP2_dimer-MP2_monomer1-MP2_monomer2)
correction_part	-0.0722635	kJ/mol: 2625.5*(correction_dimer-correction_monomer1-correction_monomer2)
dE	-2.12789	kJ/mol: 2625.5*(E_dimer - E_monomer1 - E_monomer2)

## Sheet: S09
ethene dimer in the geometry from the S22 set (see http://www.begdb.org/)
quantity (named in a self-explanatory way)	value	unit (with comments)
HF_dimer	-156.137	h (using the aQZ basis set)
HF_monomer1	-78.0692	h (using the aQZ basis set)
HF_monomer2	-78.0692	h (using the aQZ basis set)
MP2aQZ_dimer	-0.720739	h (from the DLPNO approximation)
MP2aQZ_monomer1	-0.358493	h (from the DLPNO approximation)
MP2aQZ_monomer2	-0.358493	h (from the DLPNO approximation)
CCaQZ_dimer	-0.791599	h (from the DLPNO approximation)
CCaQZ_monomer1	-0.394036	h (from the DLPNO approximation)
CCaQZ_monomer2	-0.394036	h (from the DLPNO approximation)
CCaTZ_dimer	-0.761456	h (from the DLPNO approximation)
CCaTZ_monomer1	-0.379018	h (from the DLPNO approximation)
CCaTZ_monomer2	-0.379018	h (from the DLPNO approximation)
MP2aTZ_dimer	-0.684053	h (from the DLPNO approximation)
MP2aTZ_monomer1	-0.340204	h (from the DLPNO approximation)
MP2aTZ_monomer2	-0.340204	h (from the DLPNO approximation)
MP2_dimer	-0.747511	in h: (MP2aTZ_dimer*3^3 - MP2aQZ_dimer*4^3)/(3^3-4^3)
MP2_monomer1	-0.371839	in h: (MP2aTZ_monomer1*3^3 - MP2aQZ_monomer1*4^3)/(3^3-4^3)
MP2_monomer2	-0.371839	in h: (MP2aTZ_monomer2*3^3 - MP2aQZ_monomer2*4^3)/(3^3-4^3)
MP2correction_dimer	-0.747511	in h: (MP2aTZ_dimer*3^3 - MP2aQZ_dimer*4^3)/(3^3-4^3)
MP2correction_monomer1	-0.371839	in h: (MP2aTZ_monomer1*3^3 - MP2aQZ_monomer1*4^3)/(3^3-4^3)
MP2correction_monomer2	-0.371839	in h: (MP2aTZ_monomer2*3^3 - MP2aQZ_monomer2*4^3)/(3^3-4^3)
CCcorrection_dimer	-0.813595	in h: (CCaTZ_dimer*3^3 - CCaQZ_dimer*4^3)/(3^3-4^3)
CCcorrection_monomer1	-0.404995	in h: (CCaTZ_monomer1*3^3 - CCaQZ_monomer1*4^3)/(3^3-4^3)
CCcorrection_monomer2	-0.404995	in h: (CCaTZ_monomer2*3^3 - CCaQZ_monomer2*4^3)/(3^3-4^3)
correction_dimer	-0.0660845	in h: CCcorrection_dimer - MP2correction_dimer
correction_monomer1	-0.0331558	in h: CCcorrection_monomer1 - MP2correction_monomer1
correction_monomer2	-0.0331558	in h: CCcorrection_monomer2 - MP2correction_monomer2
E_dimer	-156.951	in h: HF_dimer + MP2_dimer + correction_dimer
E_monomer1	-78.4742	in h: HF_monomer1 + MP2_monomer1 + correction_monomer1
E_monomer2	-78.4742	in h: HF_monomer2 + MP2_monomer2 + correction_monomer2
HF_part	3.46374	kJ/mol: 2625.5*(HF_dimer-HF_monomer1-HF_monomer2)
MP2_part	-10.0608	kJ/mol: 2625.5*(MP2_dimer-MP2_monomer1-MP2_monomer2)
correction_part	0.596304	kJ/mol: 2625.5*(correction_dimer-correction_monomer1-correction_monomer2)
dE	-6.00079	kJ/mol: 2625.5*(E_dimer - E_monomer1 - E_monomer2)

## Sheet: S10
benzene:methane in the geometry from the S22 set (see http://www.begdb.org/)
quantity (named in a self-explanatory way)	value	unit (with comments)
HF_dimer	-271.009	h (using the aQZ basis set)
HF_monomer1	-40.2163	h (using the aQZ basis set)
HF_monomer2	-230.794	h (using the aQZ basis set)
MP2aQZ_dimer	-1.23138	h (from the DLPNO approximation)
MP2aQZ_monomer1	-0.211173	h (from the DLPNO approximation)
MP2aQZ_monomer2	-1.01554	h (from the DLPNO approximation)
CCaQZ_dimer	-1.32015	h (from the DLPNO approximation)
CCaQZ_monomer1	-0.23551	h (from the DLPNO approximation)
CCaQZ_monomer2	-1.08065	h (from the DLPNO approximation)
CCaTZ_dimer	-1.26824	h (from the DLPNO approximation)
CCaTZ_monomer1	-0.227401	h (from the DLPNO approximation)
CCaTZ_monomer2	-1.03693	h (from the DLPNO approximation)
MP2aTZ_dimer	-1.16943	h (from the DLPNO approximation)
MP2aTZ_monomer1	-0.200964	h (from the DLPNO approximation)
MP2aTZ_monomer2	-0.963887	h (from the DLPNO approximation)
MP2_dimer	-1.2766	in h: (MP2aTZ_dimer*3^3 - MP2aQZ_dimer*4^3)/(3^3-4^3)
MP2_monomer1	-0.218622	in h: (MP2aTZ_monomer1*3^3 - MP2aQZ_monomer1*4^3)/(3^3-4^3)
MP2_monomer2	-1.05323	in h: (MP2aTZ_monomer2*3^3 - MP2aQZ_monomer2*4^3)/(3^3-4^3)
MP2correction_dimer	-1.2766	in h: (MP2aTZ_dimer*3^3 - MP2aQZ_dimer*4^3)/(3^3-4^3)
MP2correction_monomer1	-0.218622	in h: (MP2aTZ_monomer1*3^3 - MP2aQZ_monomer1*4^3)/(3^3-4^3)
MP2correction_monomer2	-1.05323	in h: (MP2aTZ_monomer2*3^3 - MP2aQZ_monomer2*4^3)/(3^3-4^3)
CCcorrection_dimer	-1.35803	in h: (CCaTZ_dimer*3^3 - CCaQZ_dimer*4^3)/(3^3-4^3)
CCcorrection_monomer1	-0.241427	in h: (CCaTZ_monomer1*3^3 - CCaQZ_monomer1*4^3)/(3^3-4^3)
CCcorrection_monomer2	-1.11255	in h: (CCaTZ_monomer2*3^3 - CCaQZ_monomer2*4^3)/(3^3-4^3)
correction_dimer	-0.0814349	in h: CCcorrection_dimer - MP2correction_dimer
correction_monomer1	-0.0228048	in h: CCcorrection_monomer1 - MP2correction_monomer1
correction_monomer2	-0.0593142	in h: CCcorrection_monomer2 - MP2correction_monomer2
E_dimer	-272.367	in h: HF_dimer + MP2_dimer + correction_dimer
E_monomer1	-40.4577	in h: HF_monomer1 + MP2_monomer1 + correction_monomer1
E_monomer2	-231.907	in h: HF_monomer2 + MP2_monomer2 + correction_monomer2
HF_part	4.89089	kJ/mol: 2625.5*(HF_dimer-HF_monomer1-HF_monomer2)
MP2_part	-12.4496	kJ/mol: 2625.5*(MP2_dimer-MP2_monomer1-MP2_monomer2)
correction_part	1.7961	kJ/mol: 2625.5*(correction_dimer-correction_monomer1-correction_monomer2)
dE	-5.76262	kJ/mol: 2625.5*(E_dimer - E_monomer1 - E_monomer2)

[truncated: 37 more sheets: S11, S12, S13, S14, S15, S16, S17, S18, S19, S20, S21, S22, aniline-methane, anisole-methane, naphtol-methane, naphtol-CO, napthol-CO2, anisole dimer, anisole-ammonia, napthol_acetylene …]
